# Supplementary material for: A facile, three-component domino protocol for the microwave-assisted synthesis of functionalized naphtho[2,3-b]furan-4,9-diones in water
Source: Royal Society of Chemistry journal article supplement (doi:10.1039/c0gc00952k), 2011-01-01

Supplementary Material (ESI) for Green Chemistry  
This journal is © The Royal Society of Chemistry 2010

## Supporting Information

### **A facile, three-component domino protocol for the microwave-assisted synthesis of functionalized naphtho[2,3-*b*]furan-4,9-diones in water**

**Pitchaimani Prasanna,<sup>a</sup> Kamaraj Balamurugan,<sup>a</sup> Subbu Perumal,<sup>\*a</sup> and J. Carlos Menéndez<sup>\*b</sup>**

<sup>a</sup>*Department of Organic Chemistry, School of Chemistry, Madurai Kamaraj University, Madurai 625021, India. Fax: 91-452-2459845. E-mail: subbu.perum@gmail.com.*

<sup>b</sup>*Departamento de Química Orgánica y Farmacéutica, Facultad de Farmacia, Universidad Complutense, 28040 Madrid, Spain. Fax: 34-91-3941822. E-mail: josecm@farm.ucm.es.*

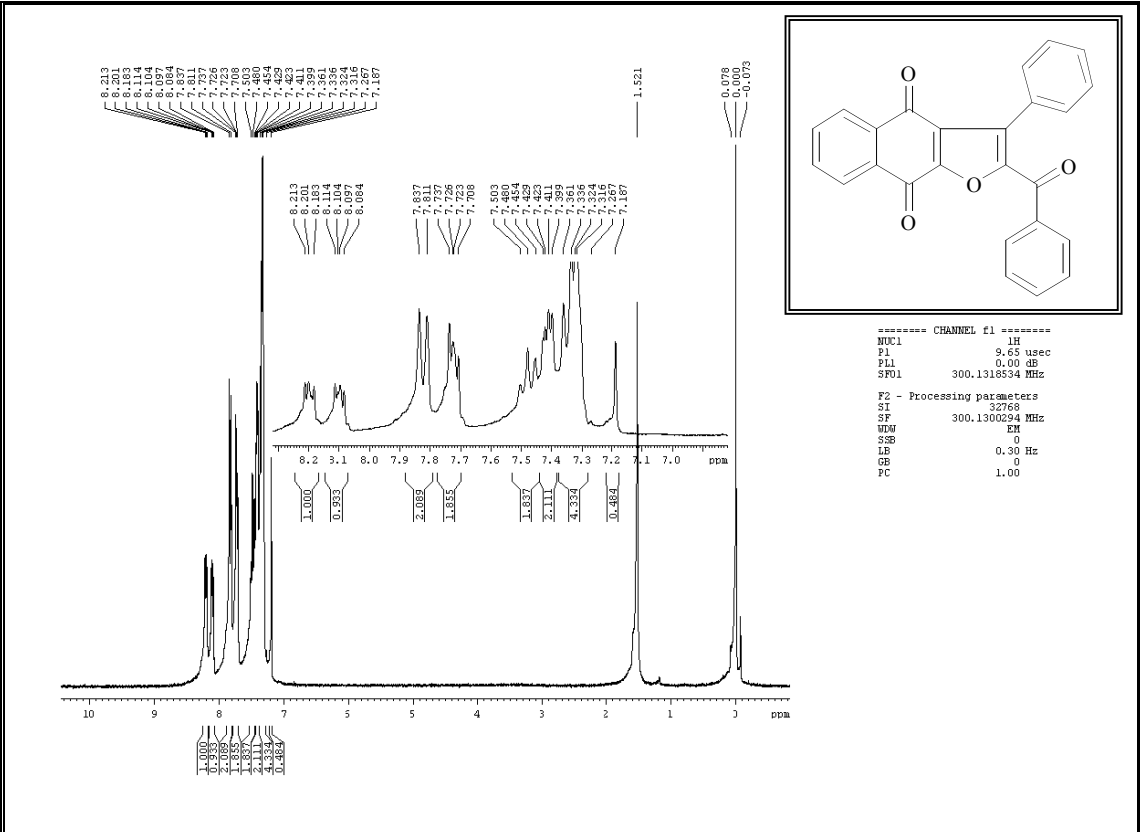

<sup>1</sup>H NMR spectrum of 10a

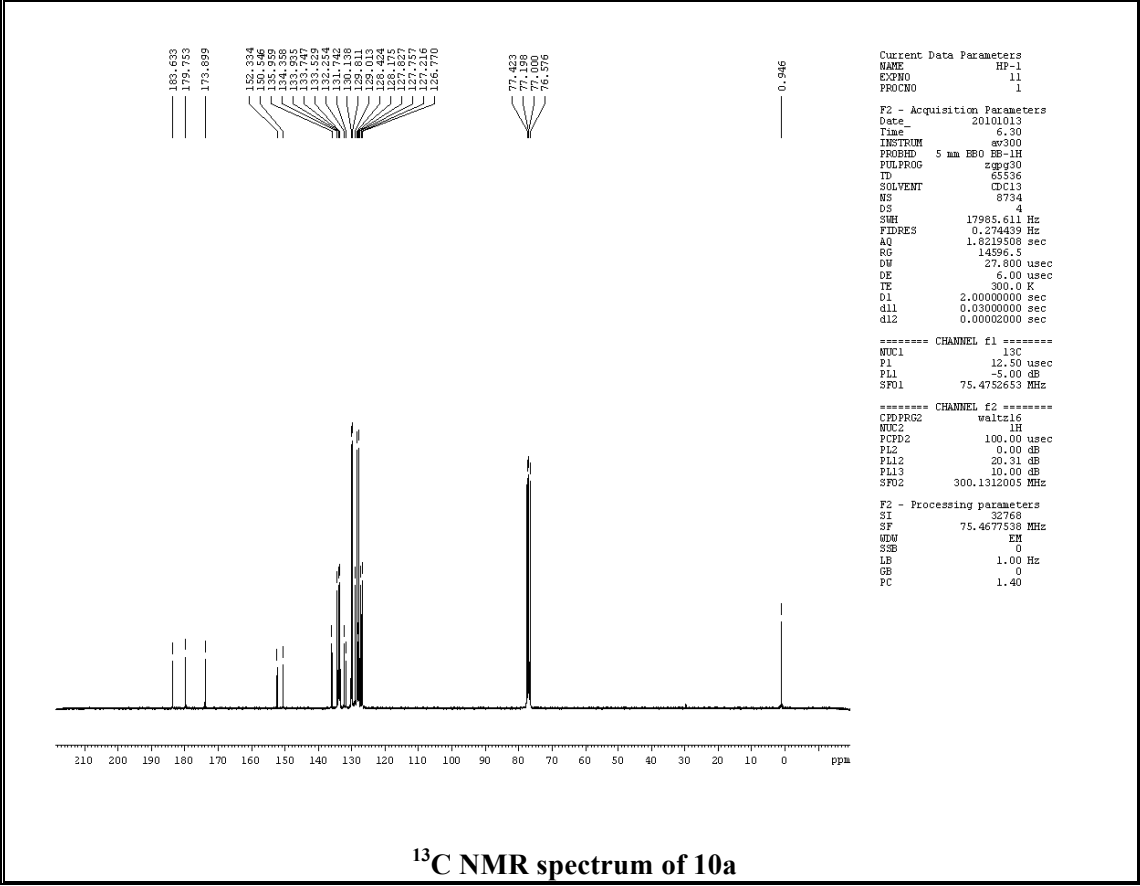

<sup>13</sup>C NMR spectrum of 10a

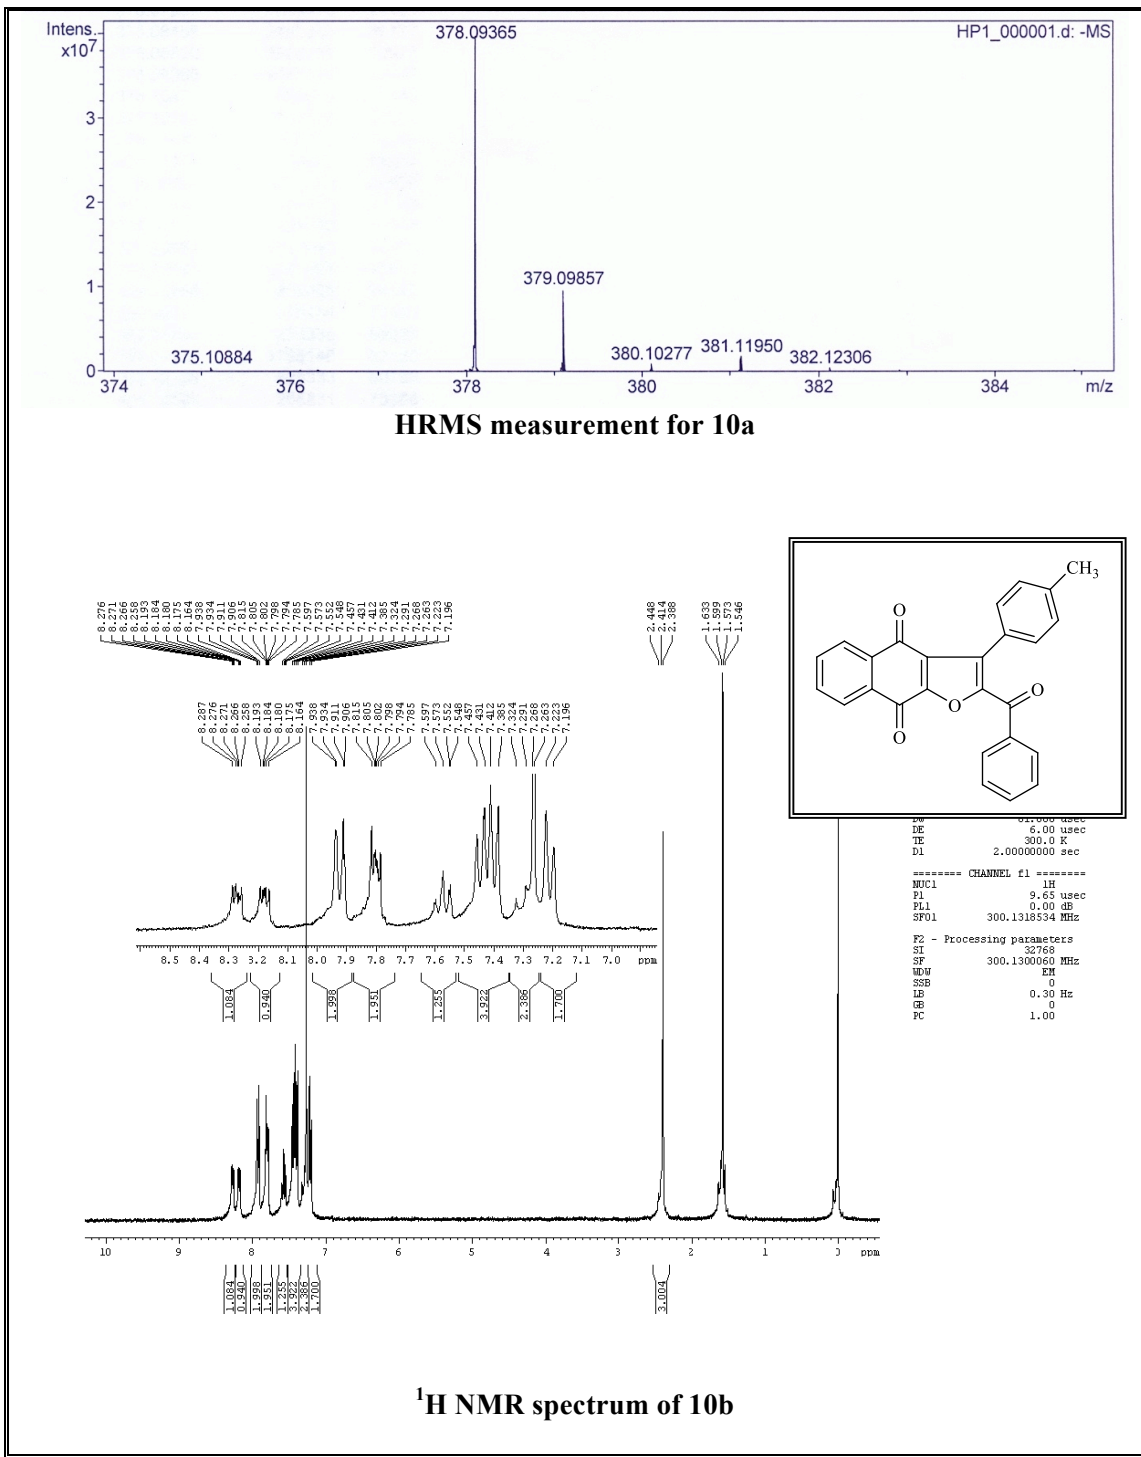

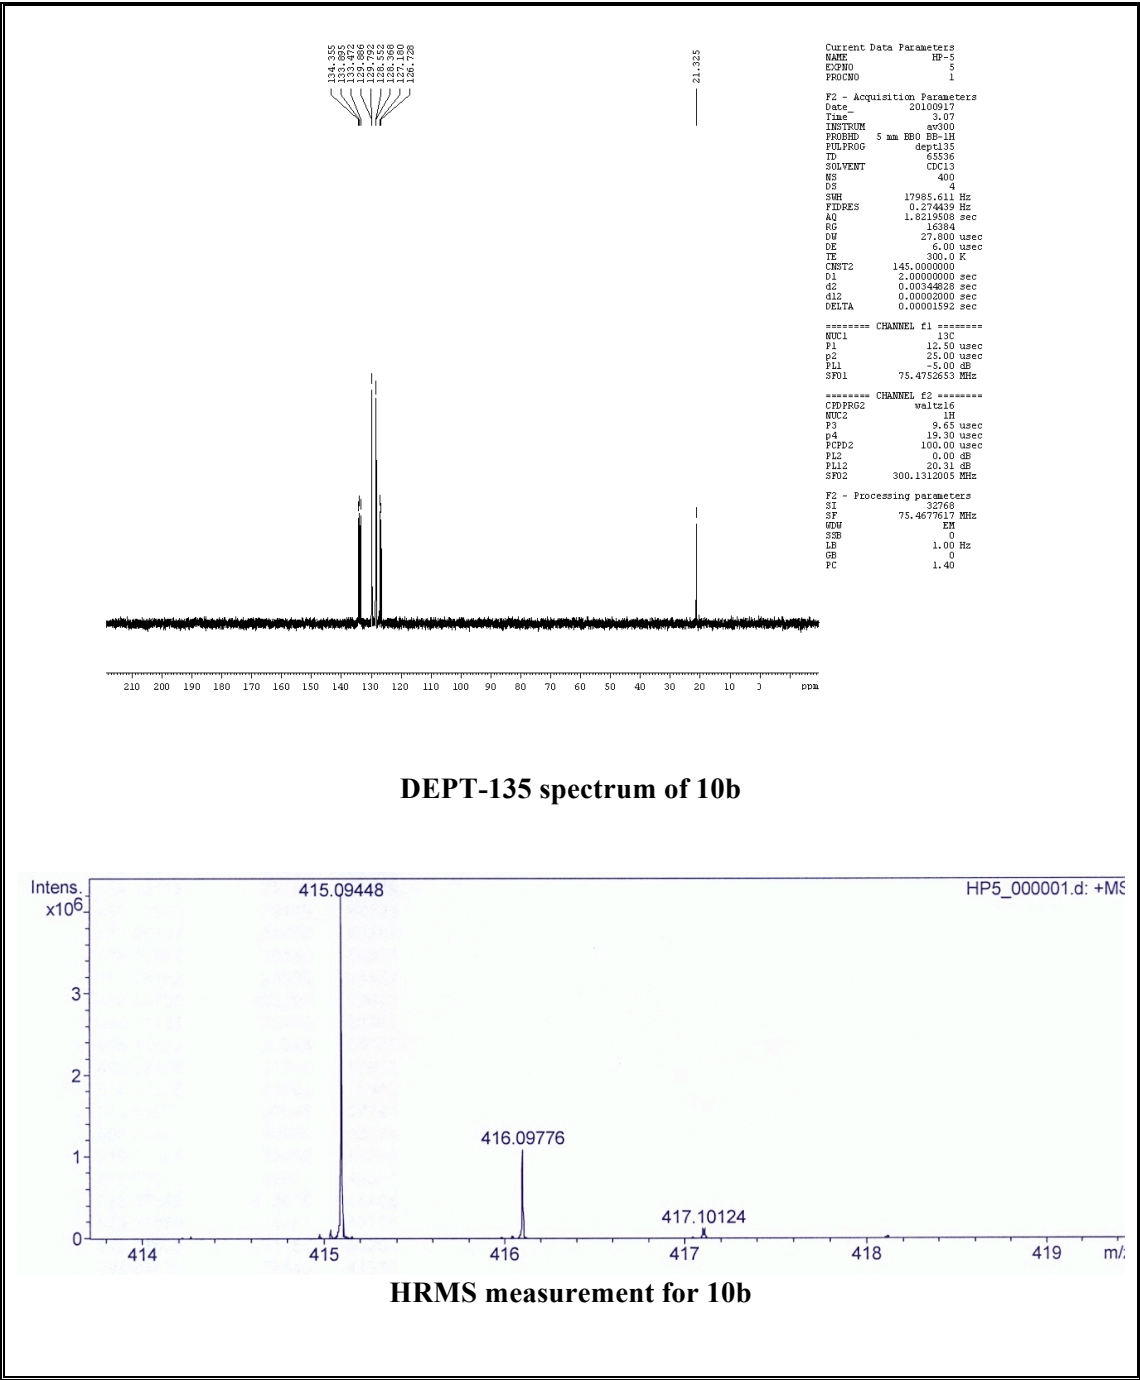

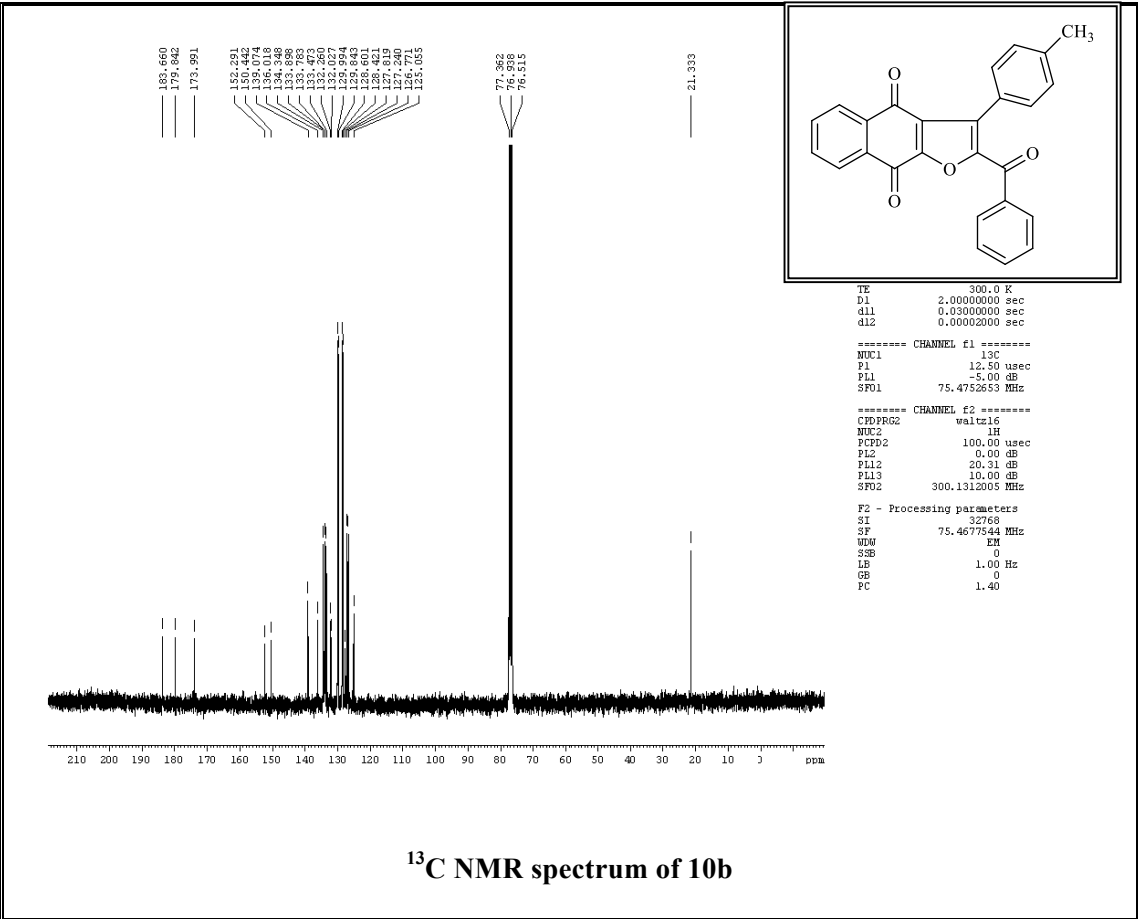

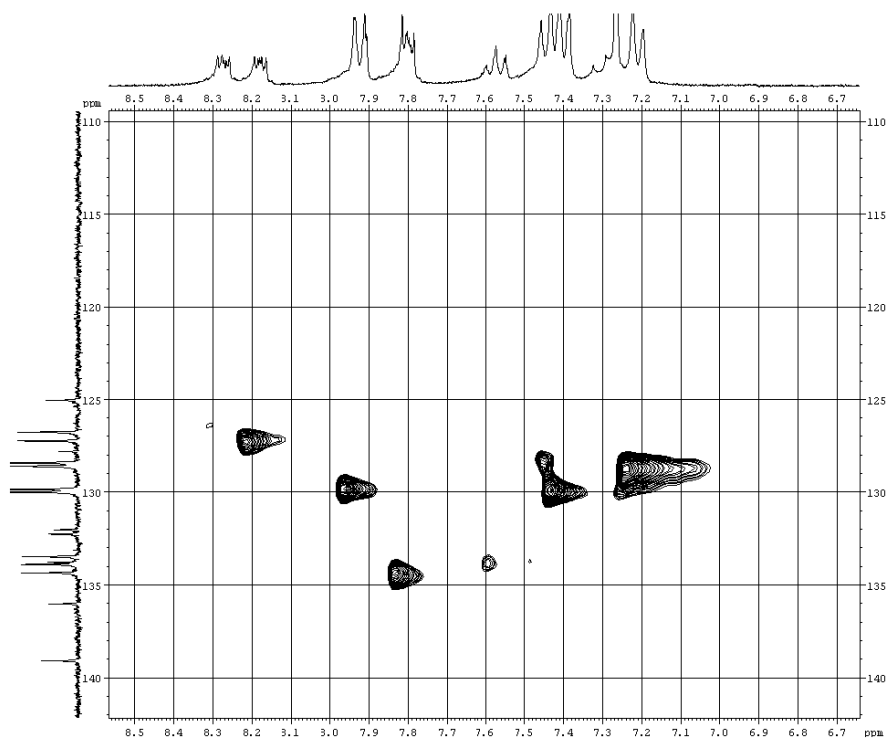

**C,H-COSY spectrum of 10b**

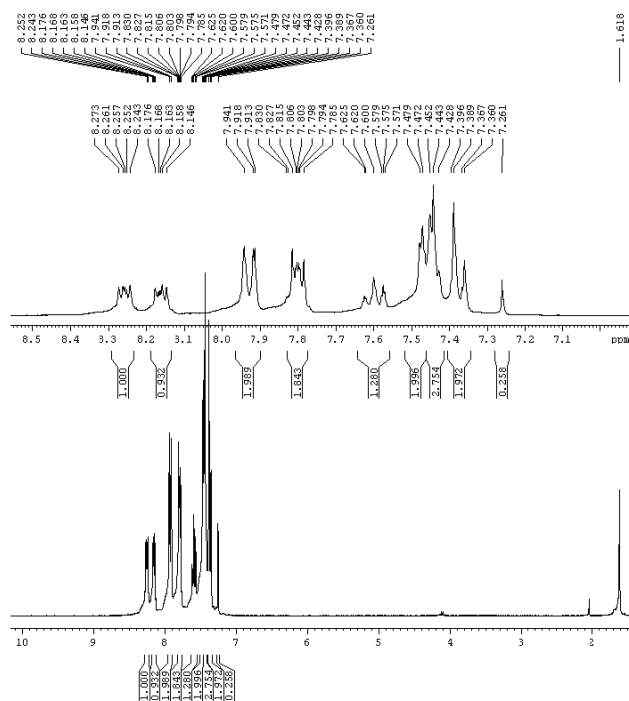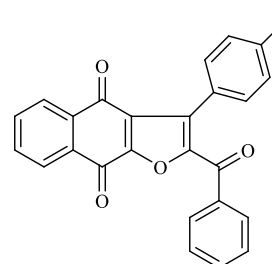

```

TE          300.0 K
D1          2.00000000 sec

----- CHANNEL f1 -----
NUC1        1H
P1          1.95 usec
PL1         0.00 dB
SF01        300.1318534 MHz

F2 - Processing parameters
SI          32768
SF          300.1300077 MHz
WDW         EH
SSB         0
LB          0.30 Hz
GB          0
PC          1.00

```

**<sup>1</sup>H NMR spectrum of 10c**

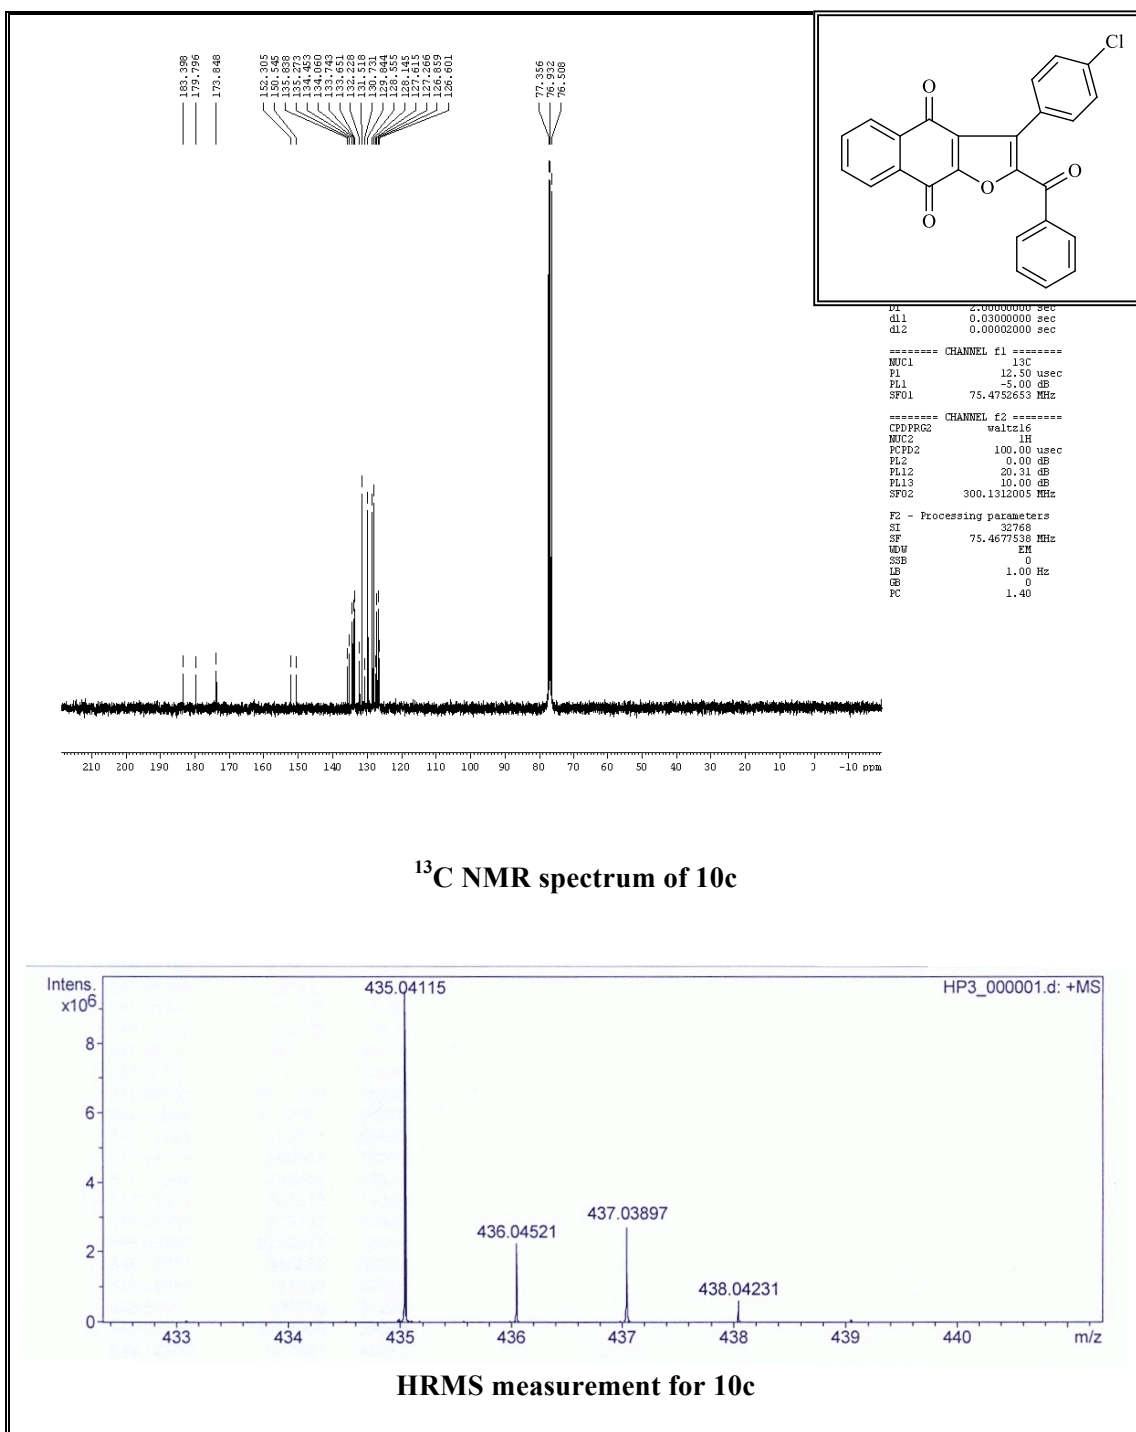

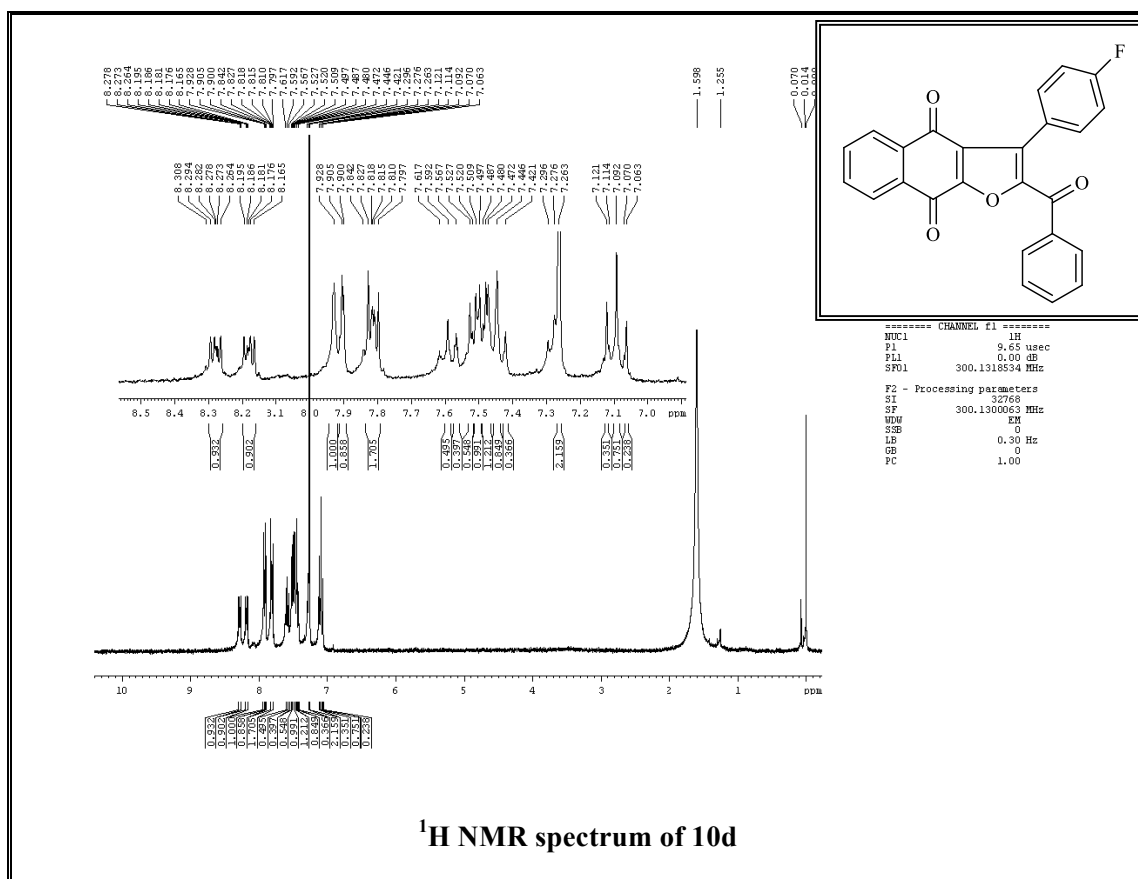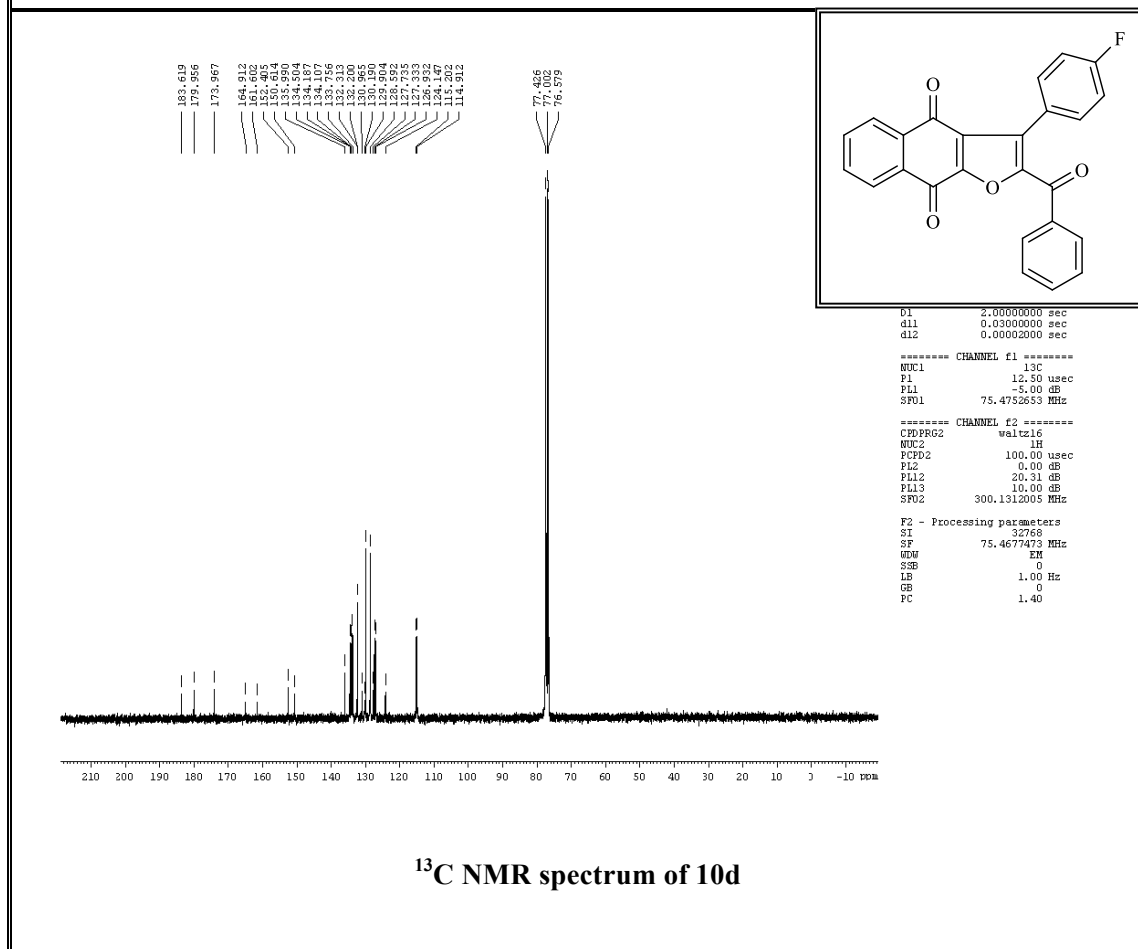





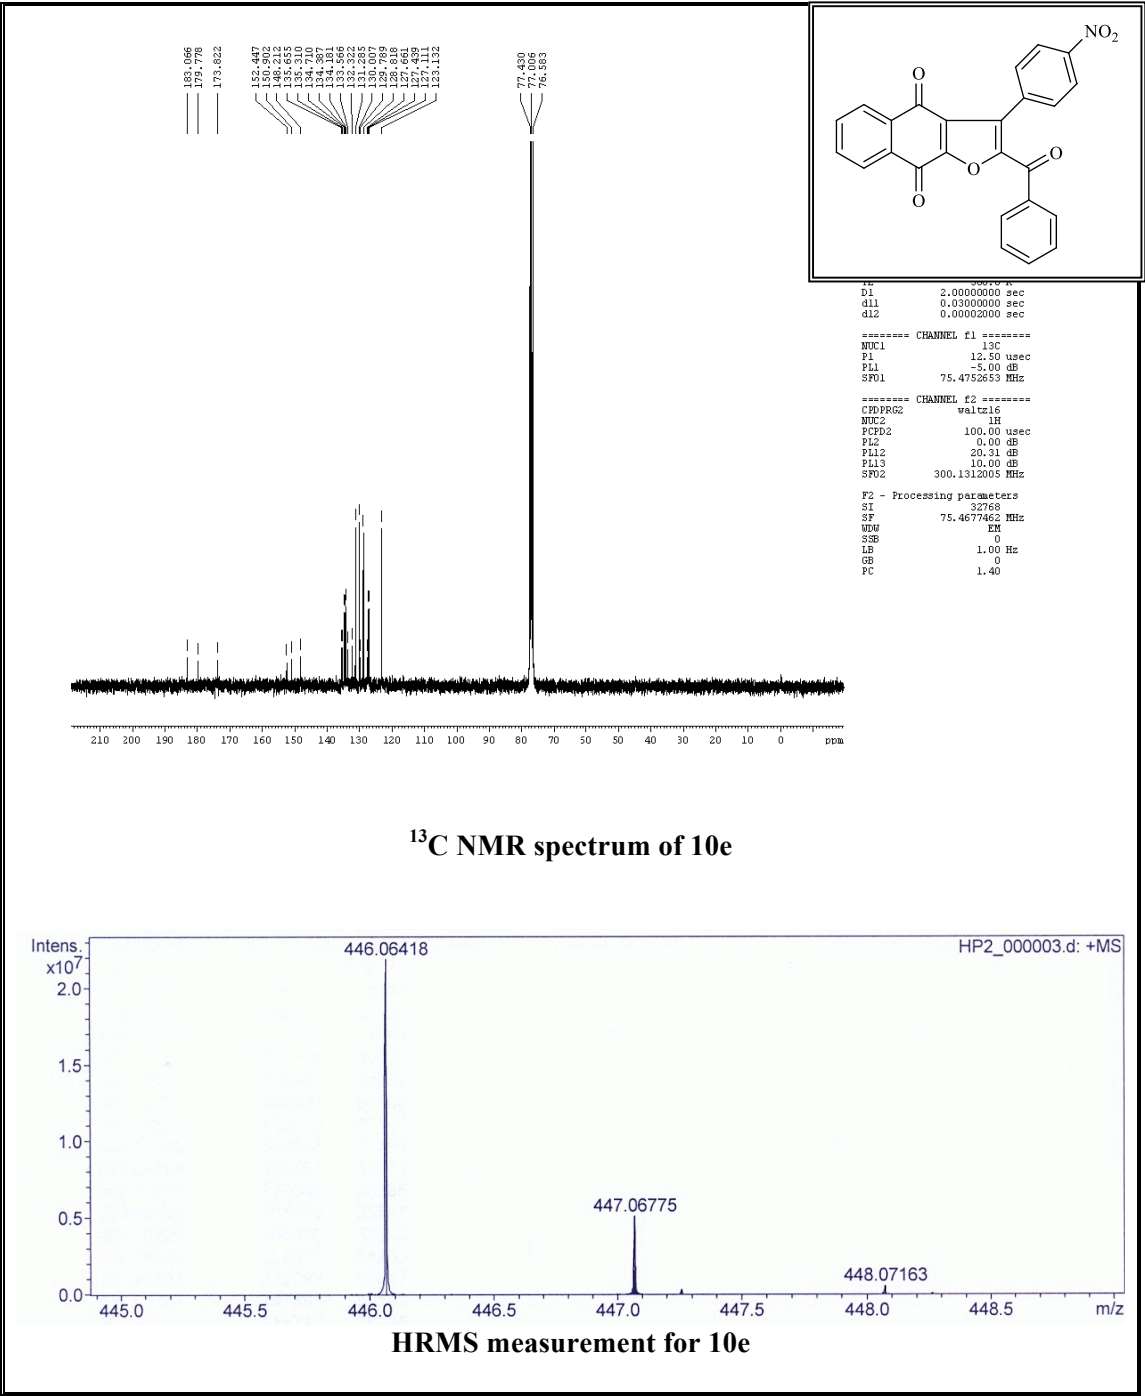

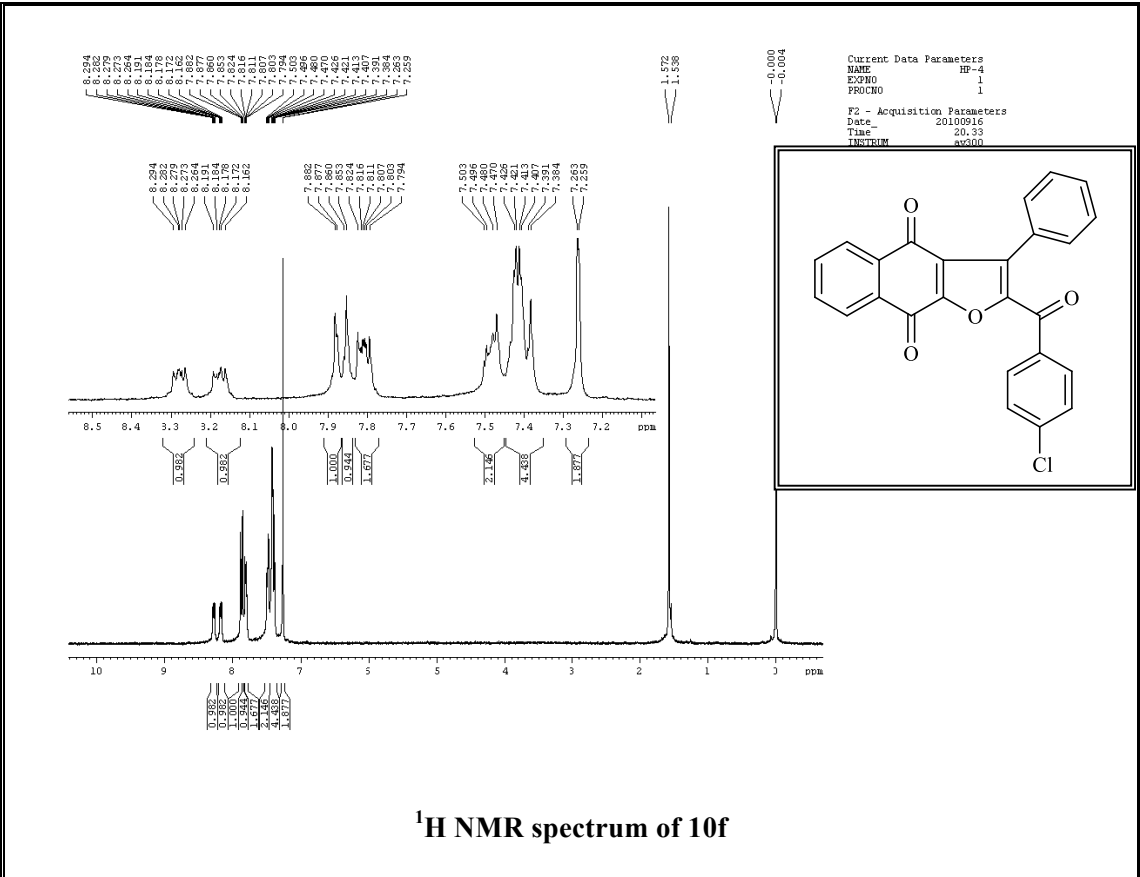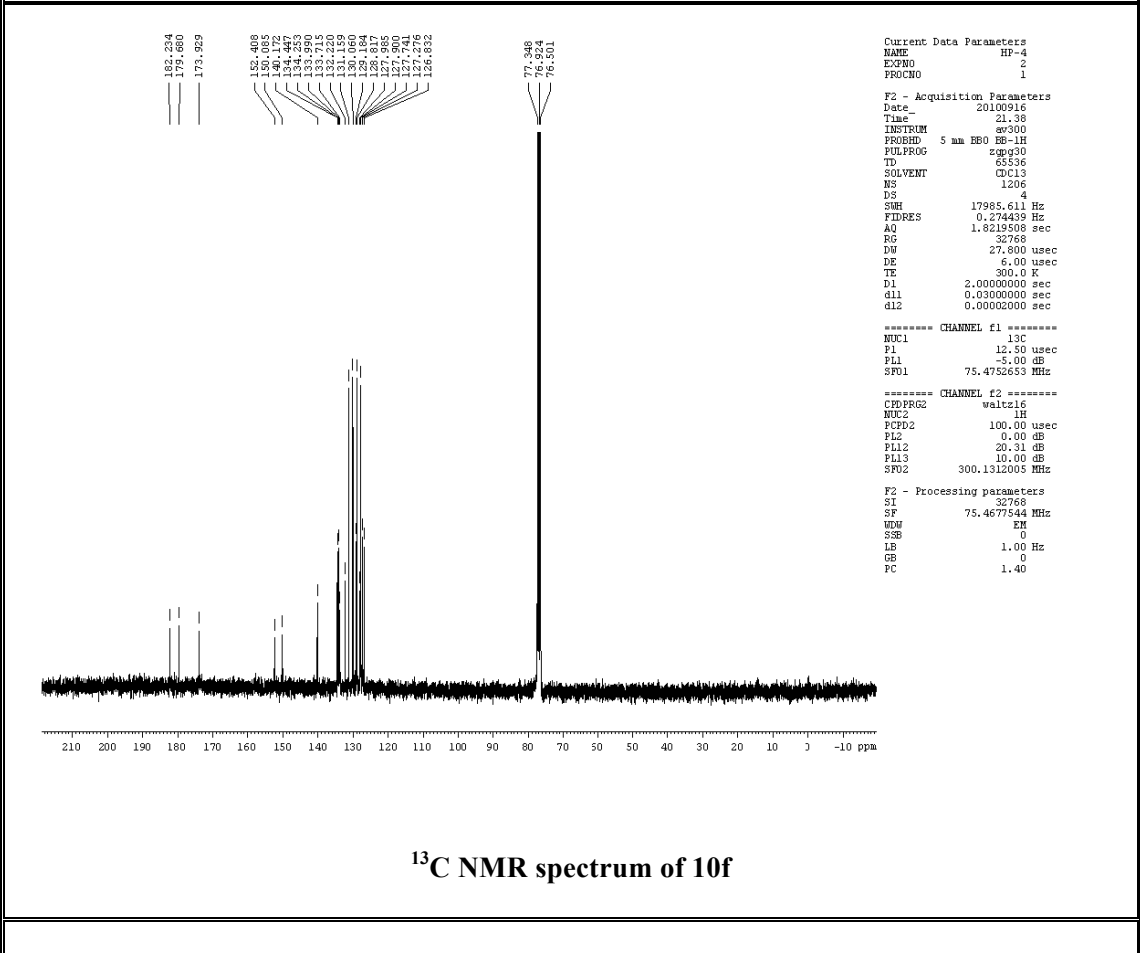

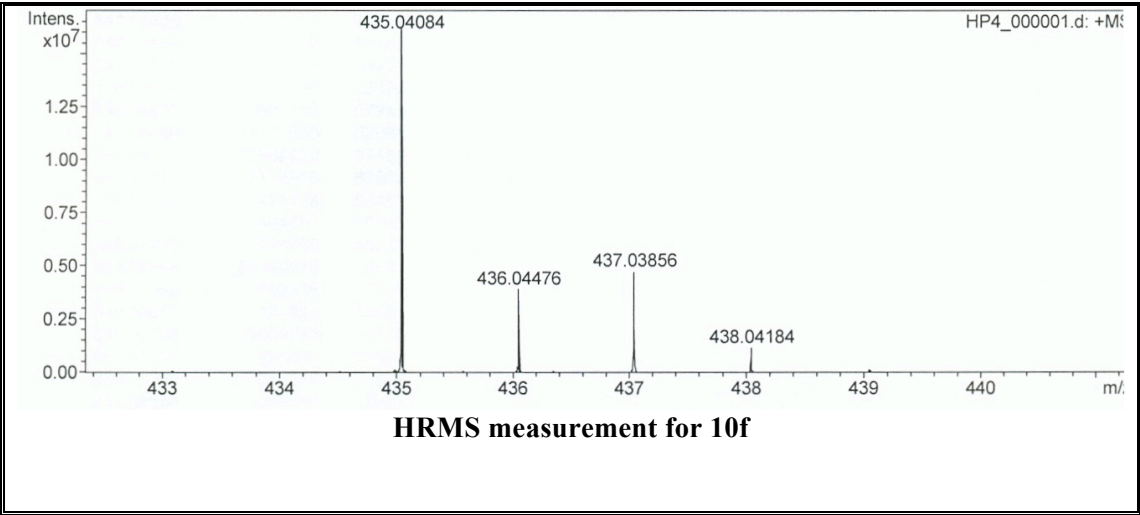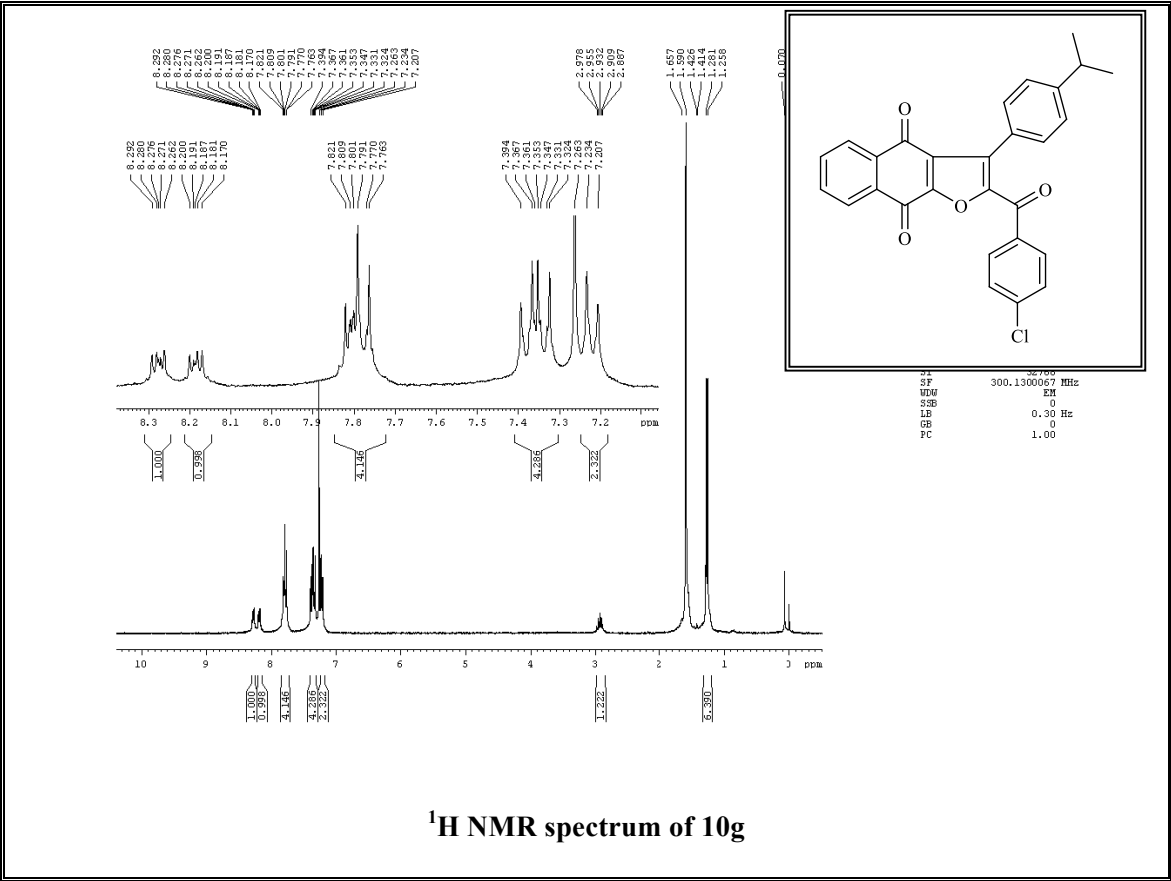

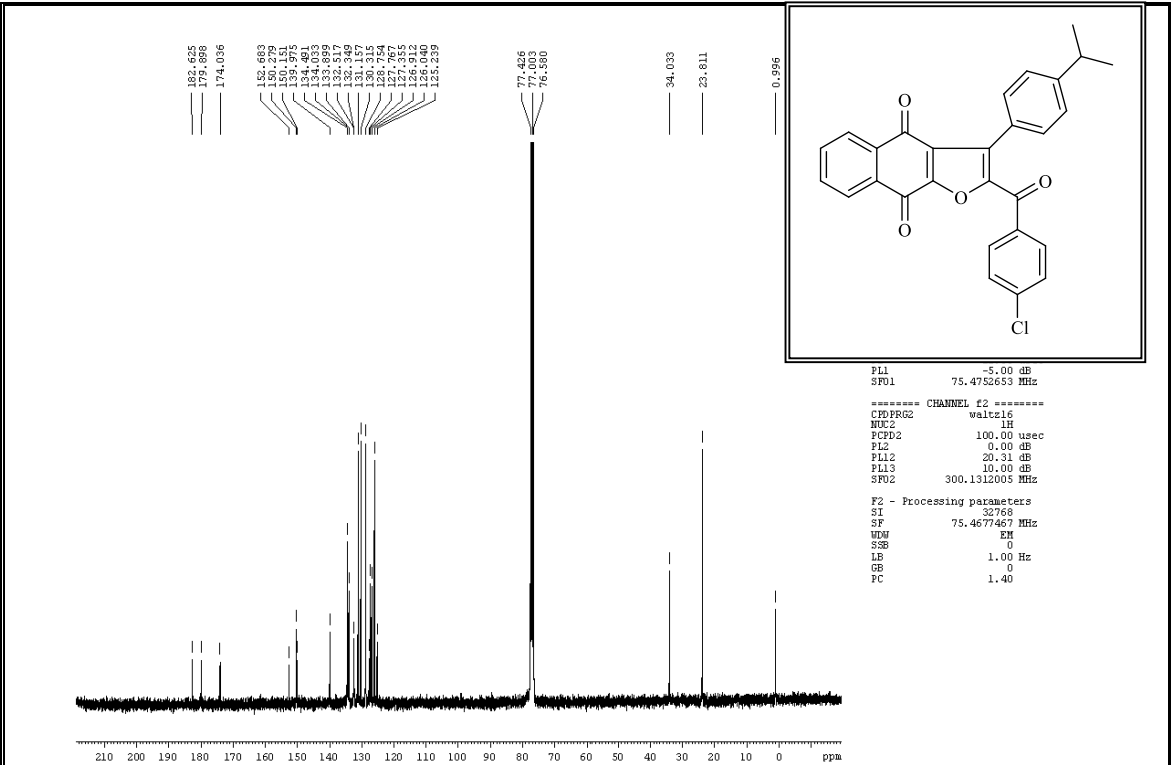

**<sup>13</sup>C NMR spectrum of 10g**

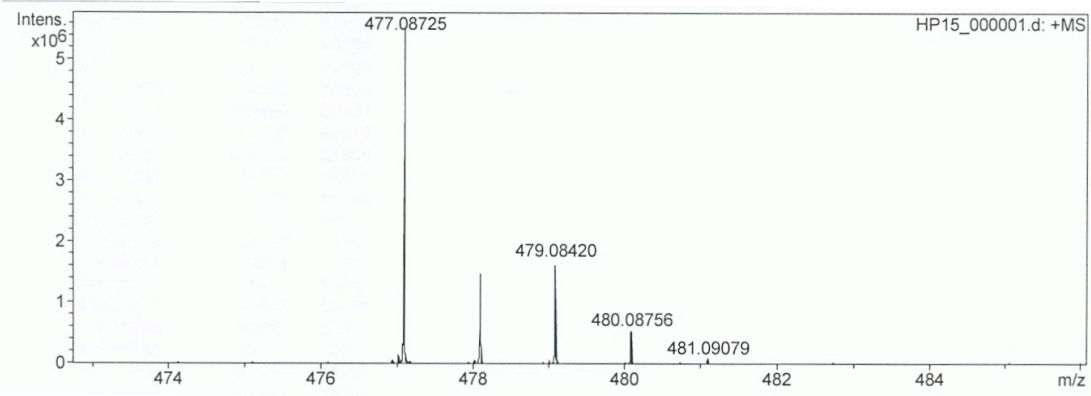

**HRMS measurement for 10g**

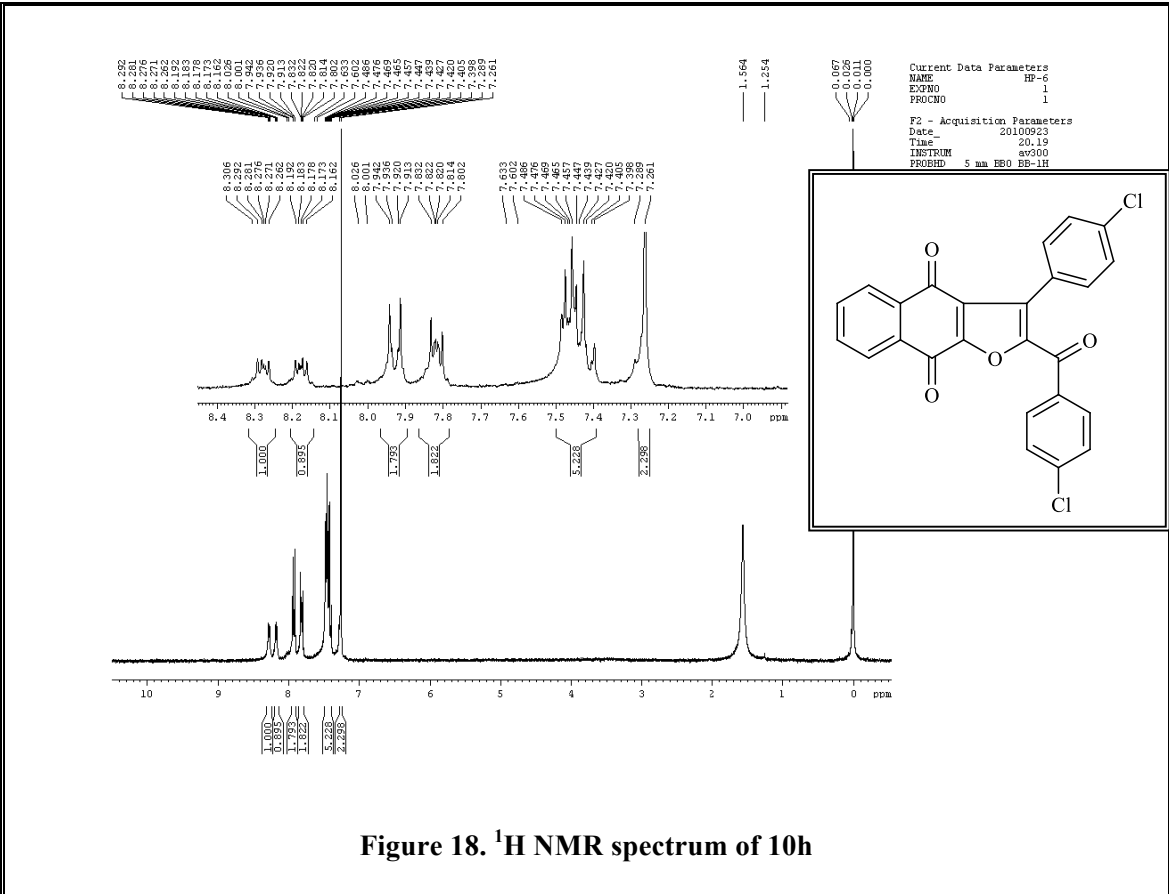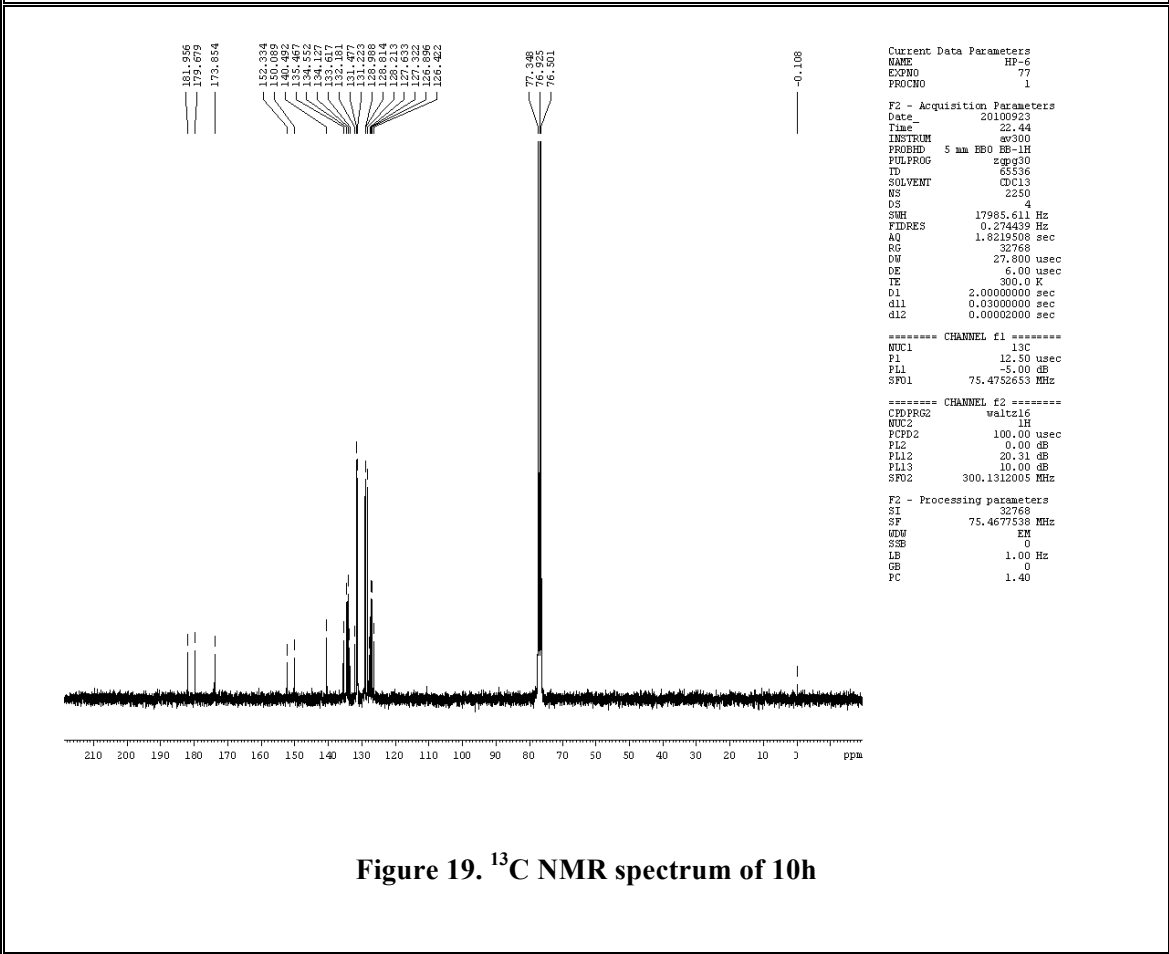

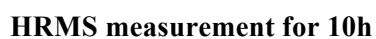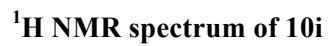

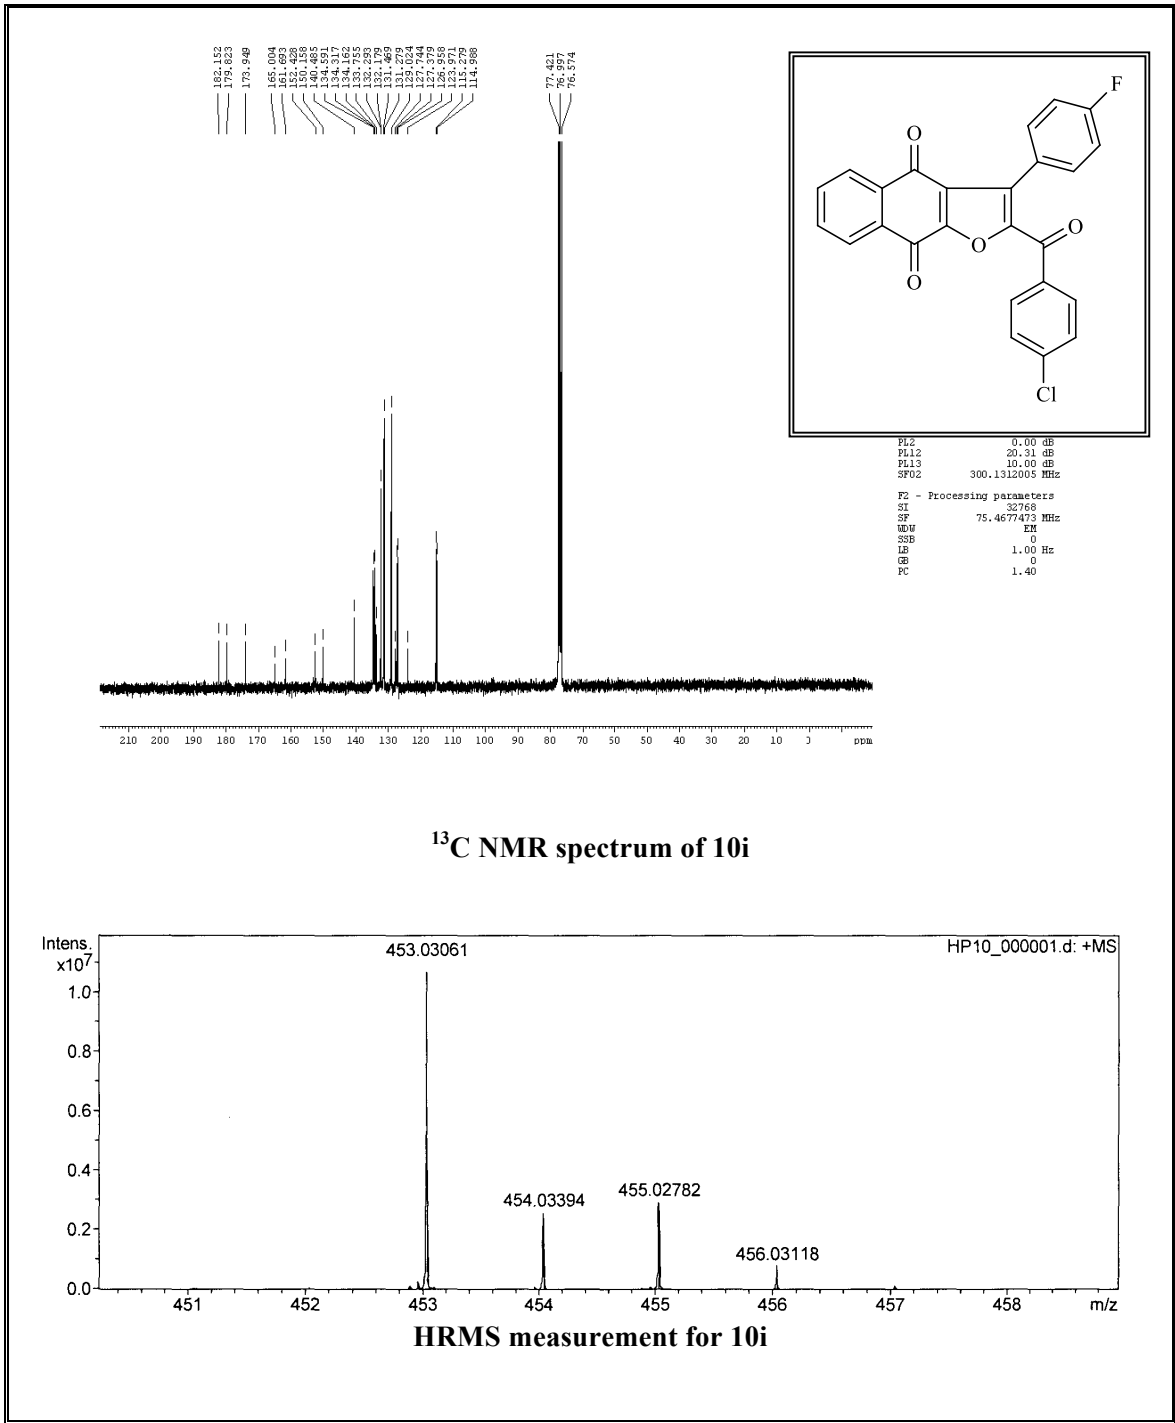



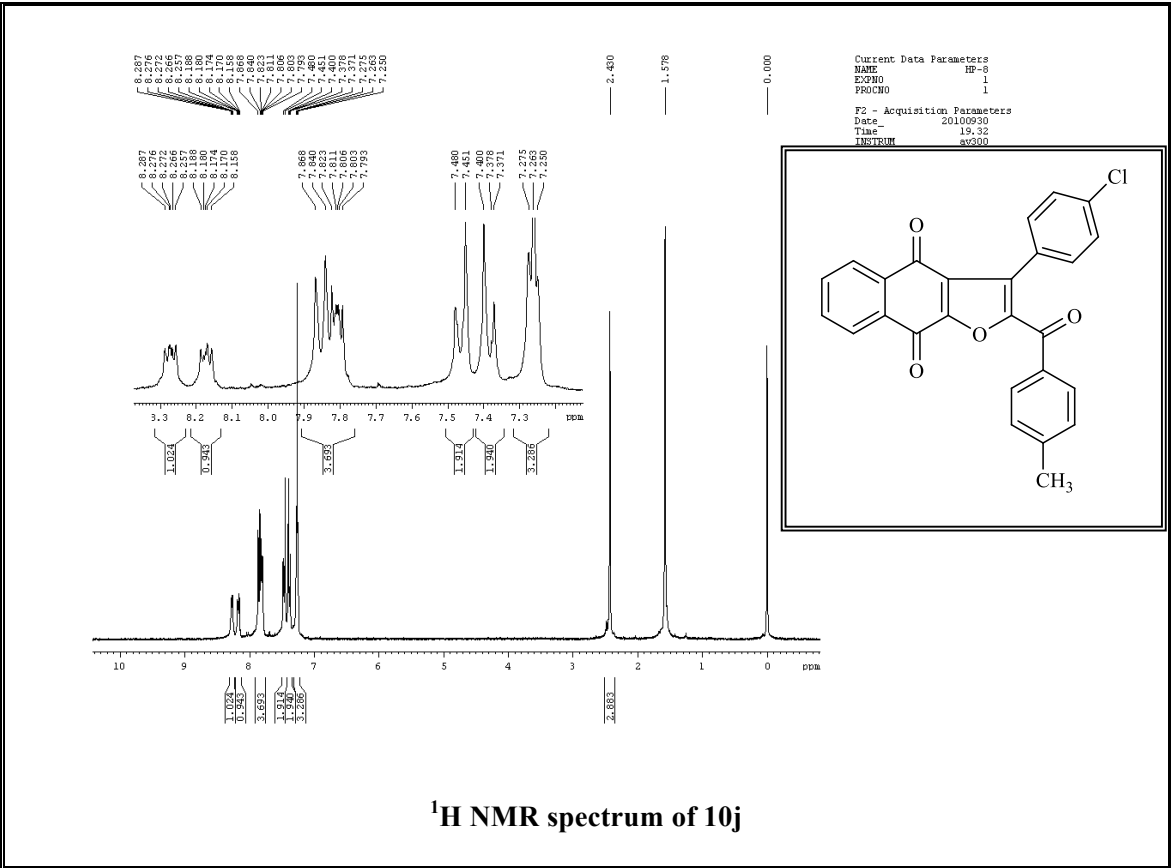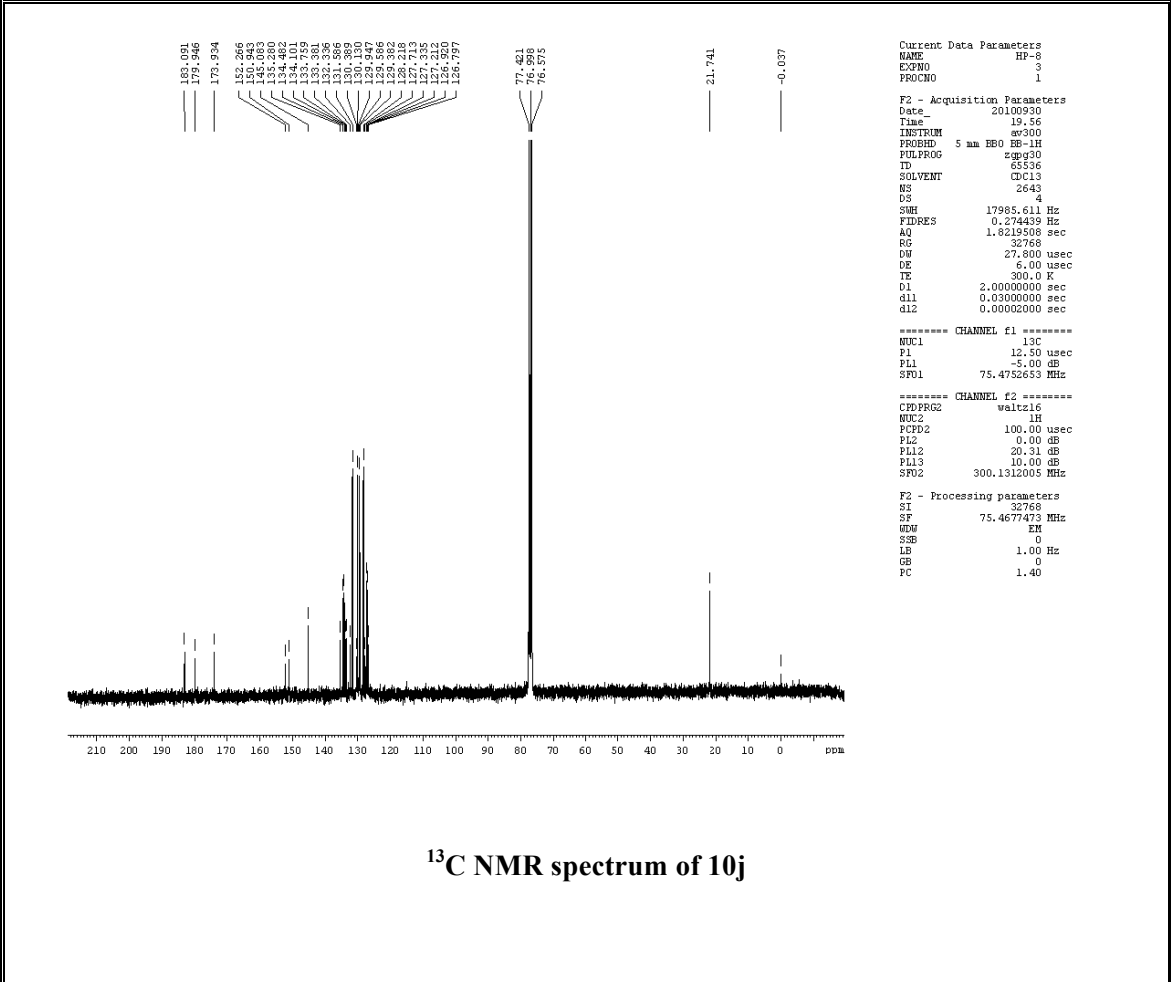

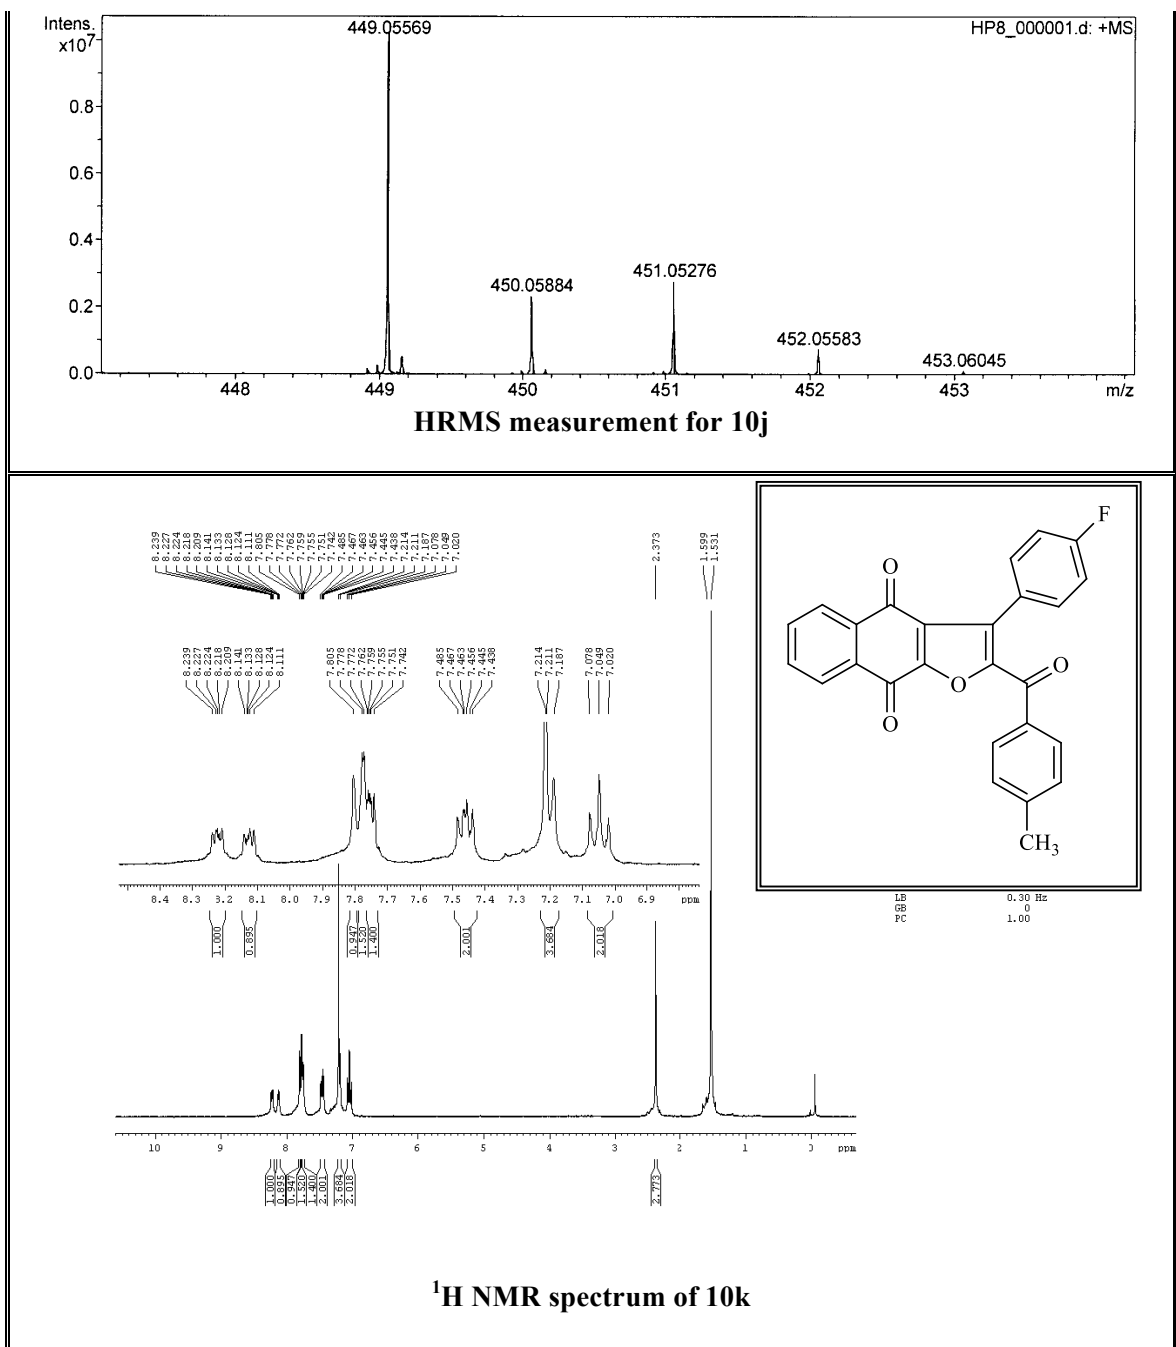

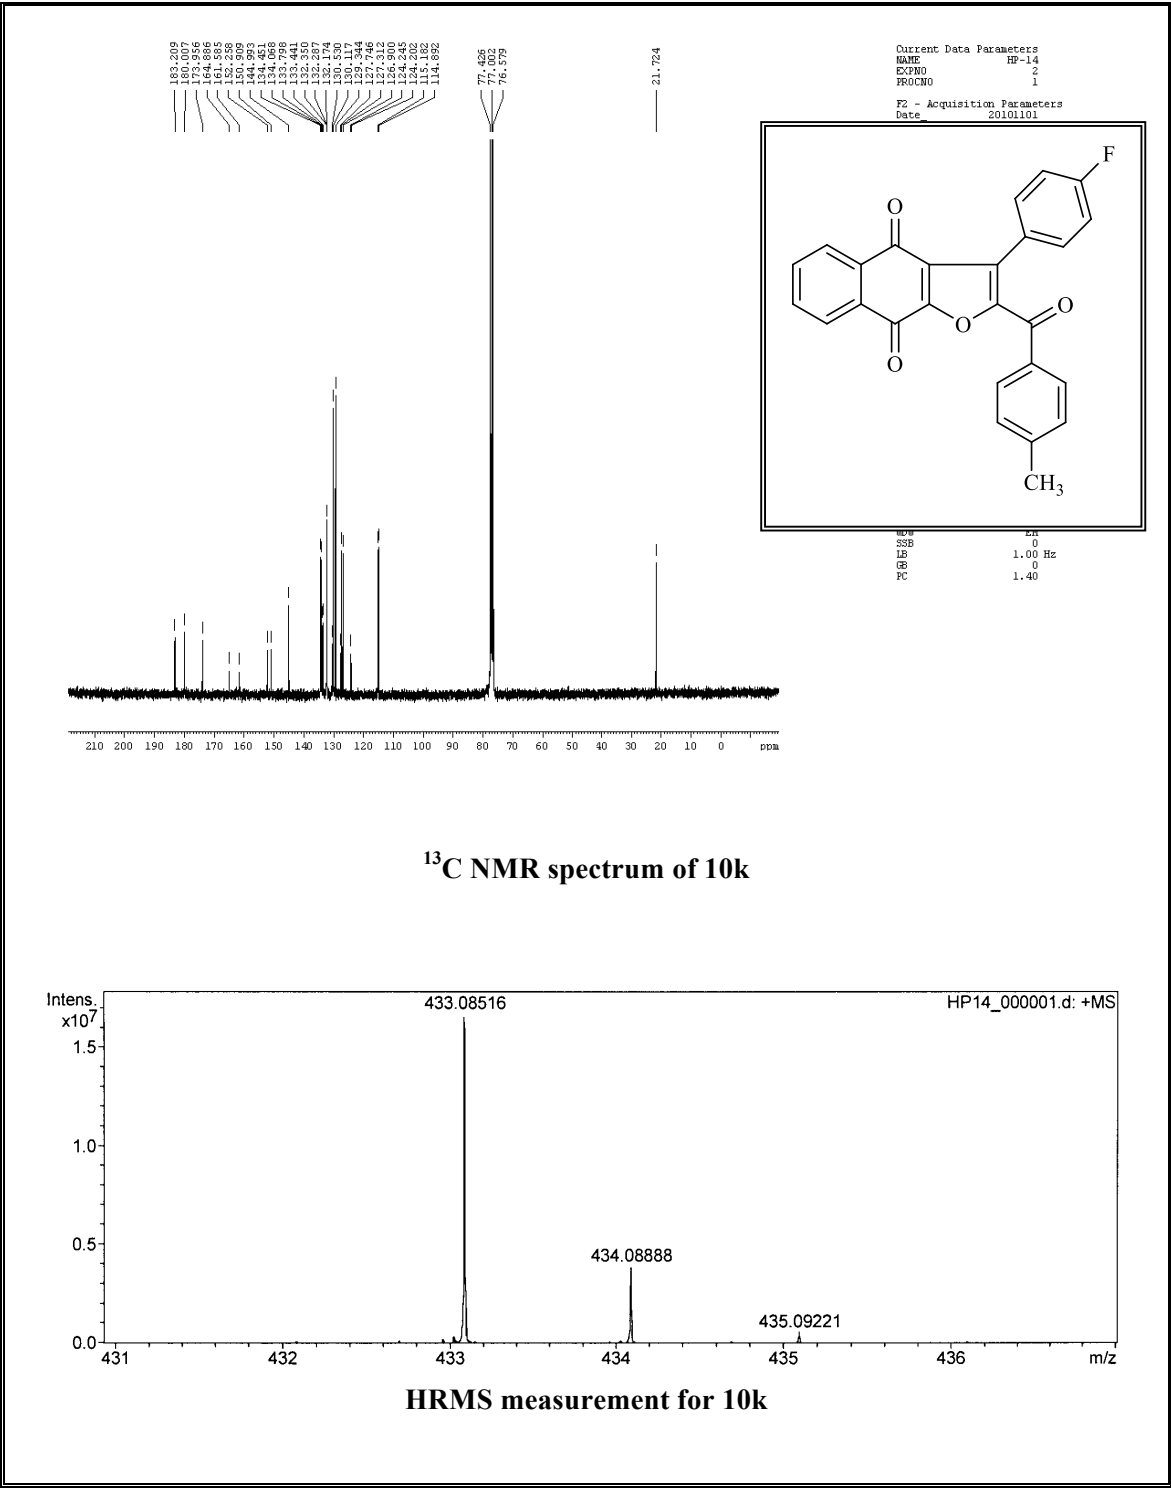



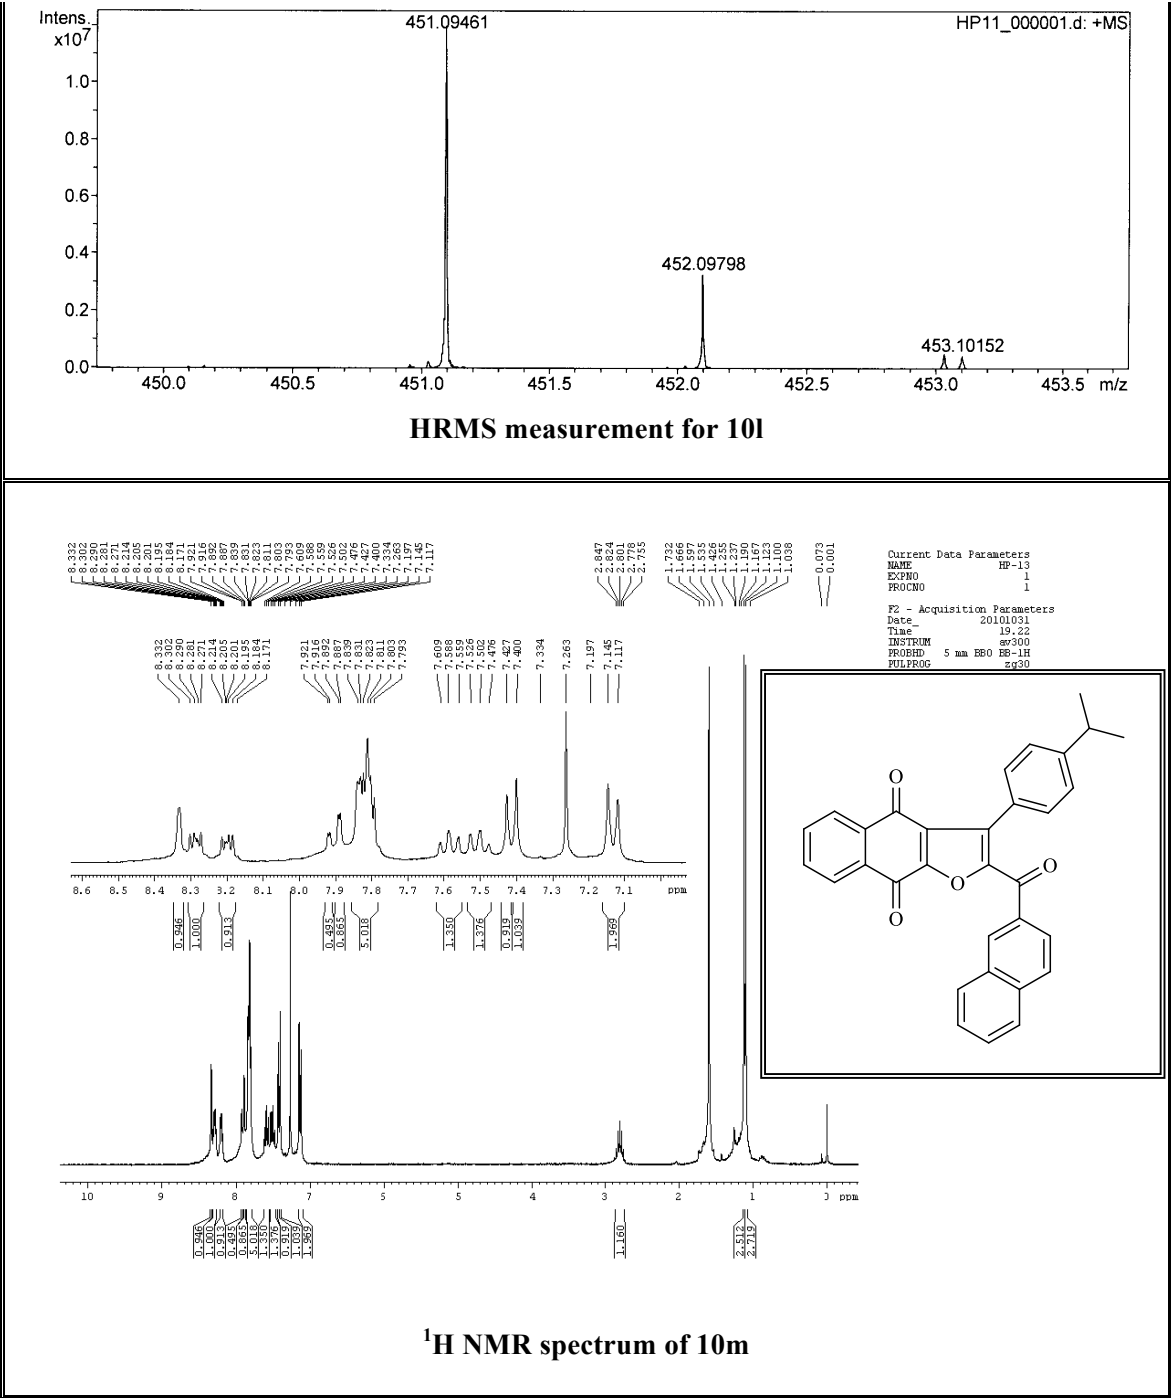

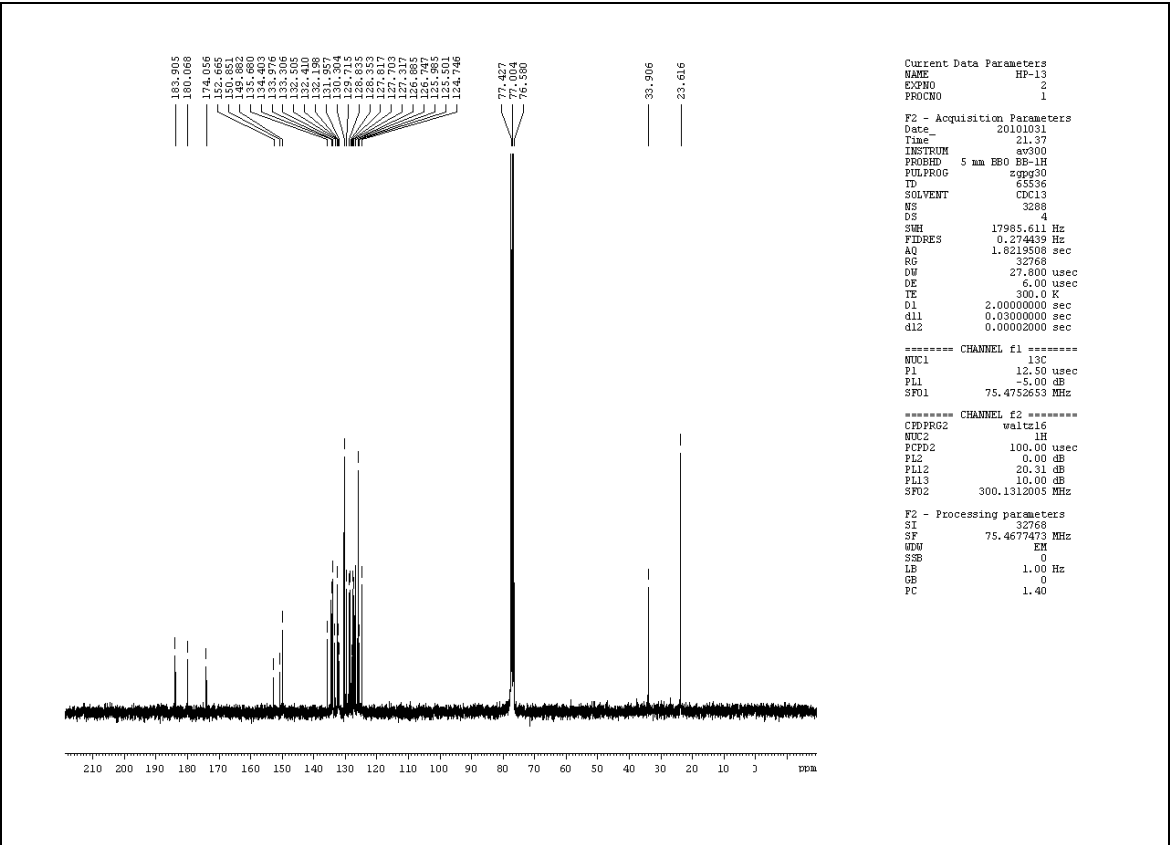

<sup>13</sup>C NMR spectrum of 10m

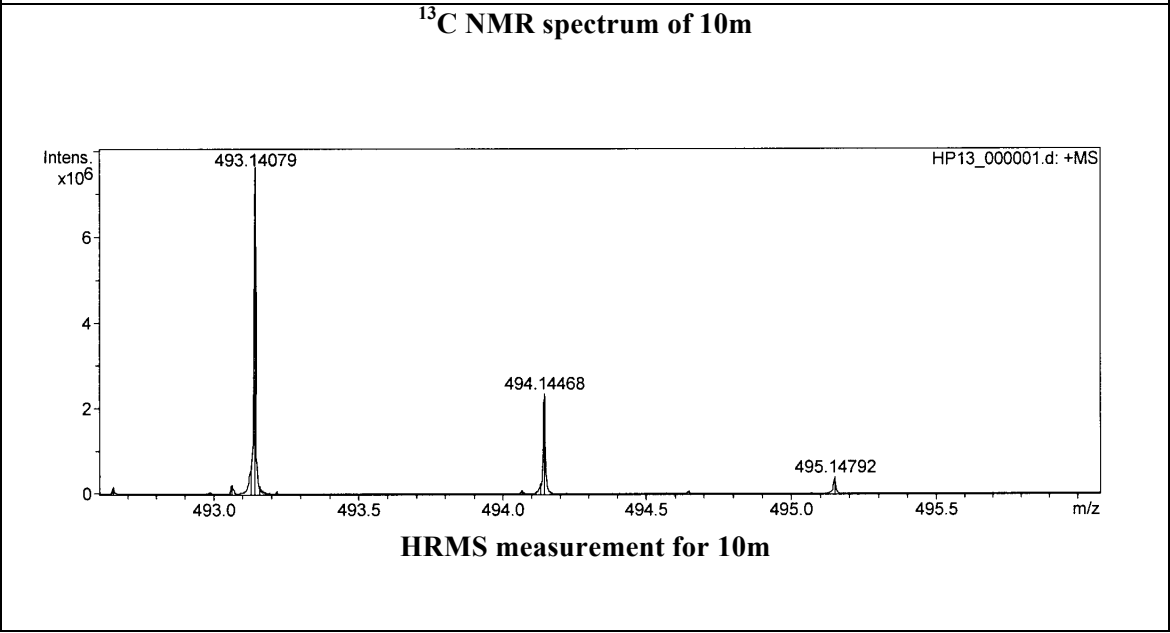

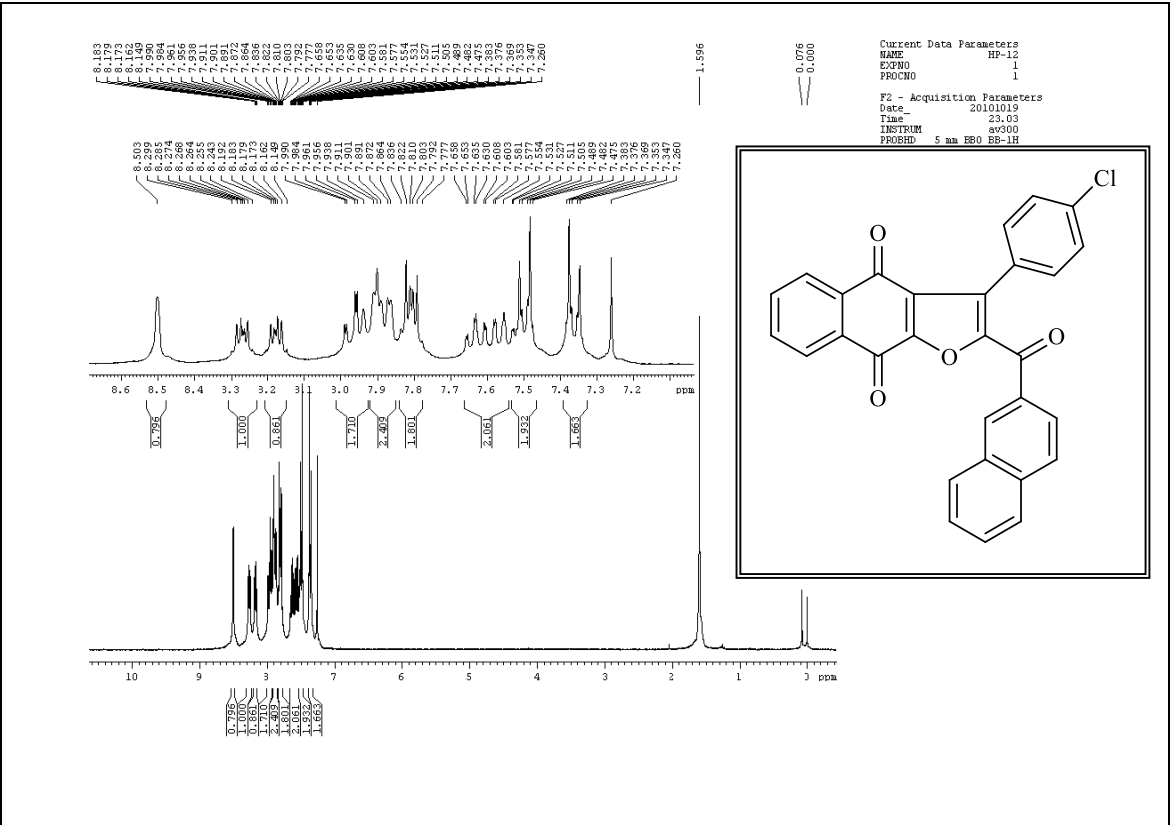

<sup>1</sup>H NMR spectrum of 10n

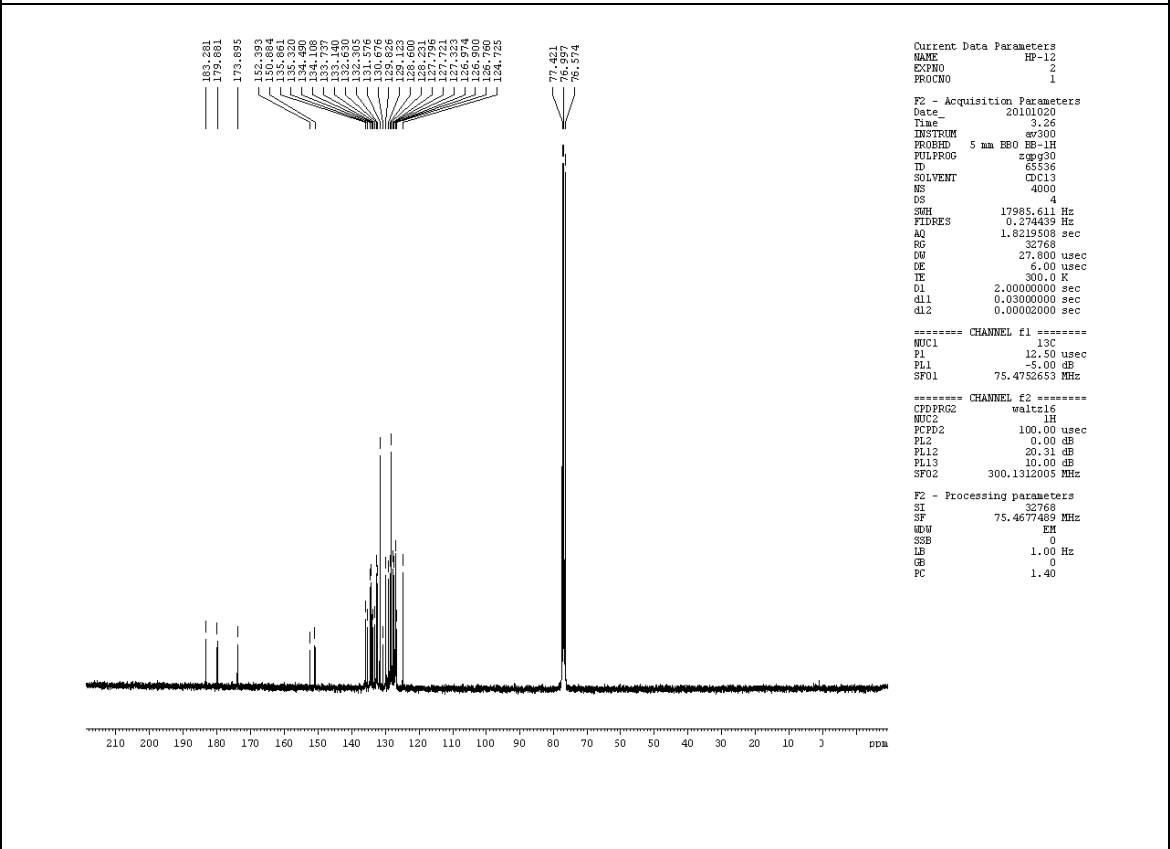

<sup>13</sup>C NMR spectrum of 10n

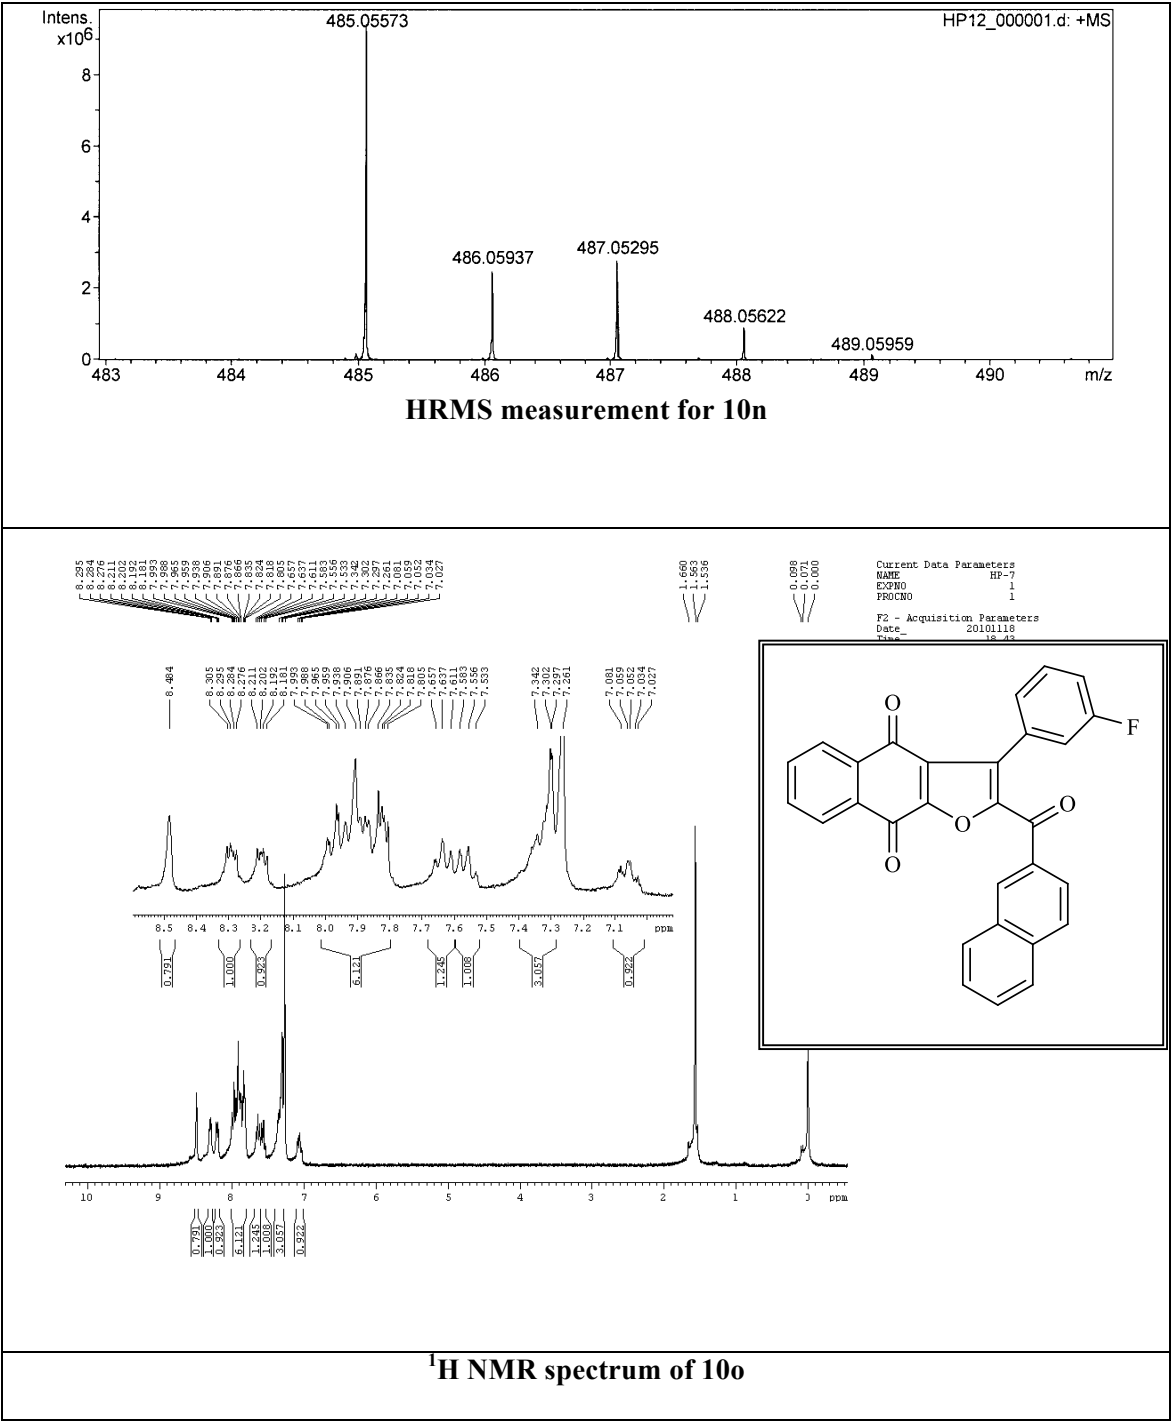



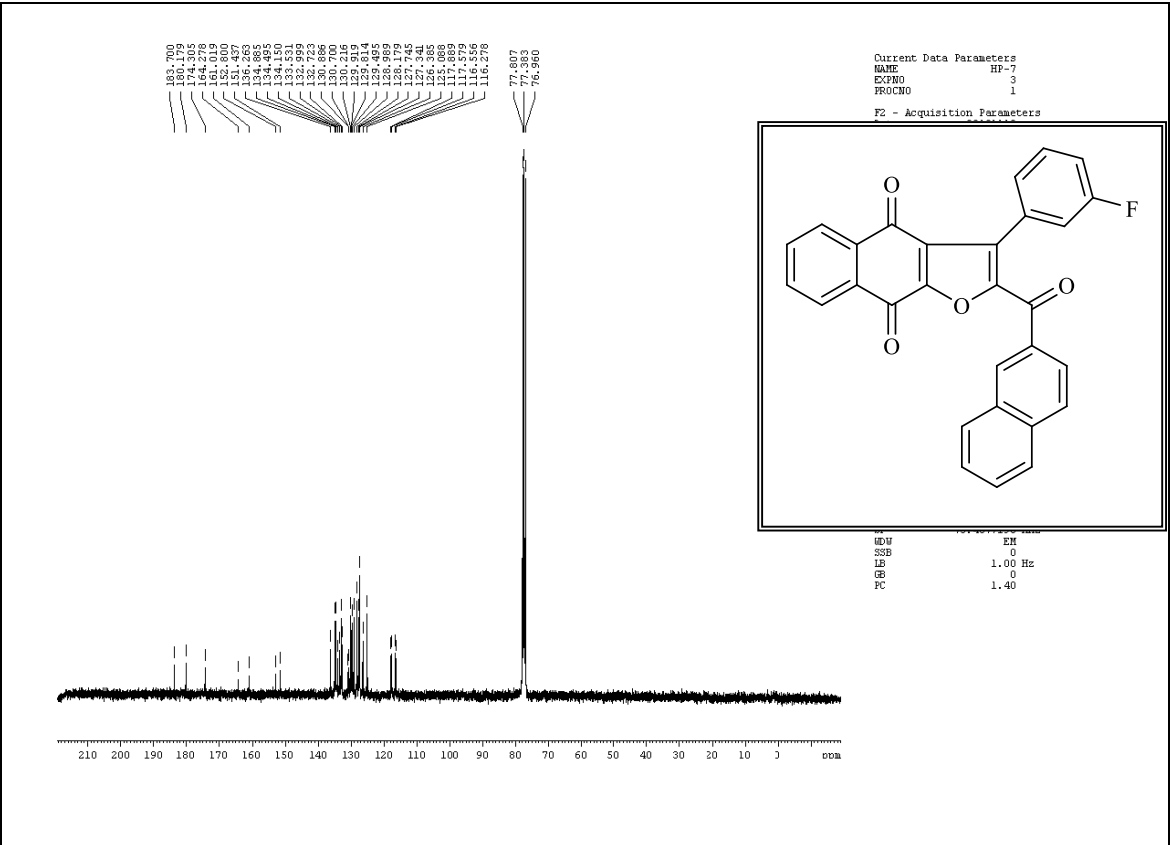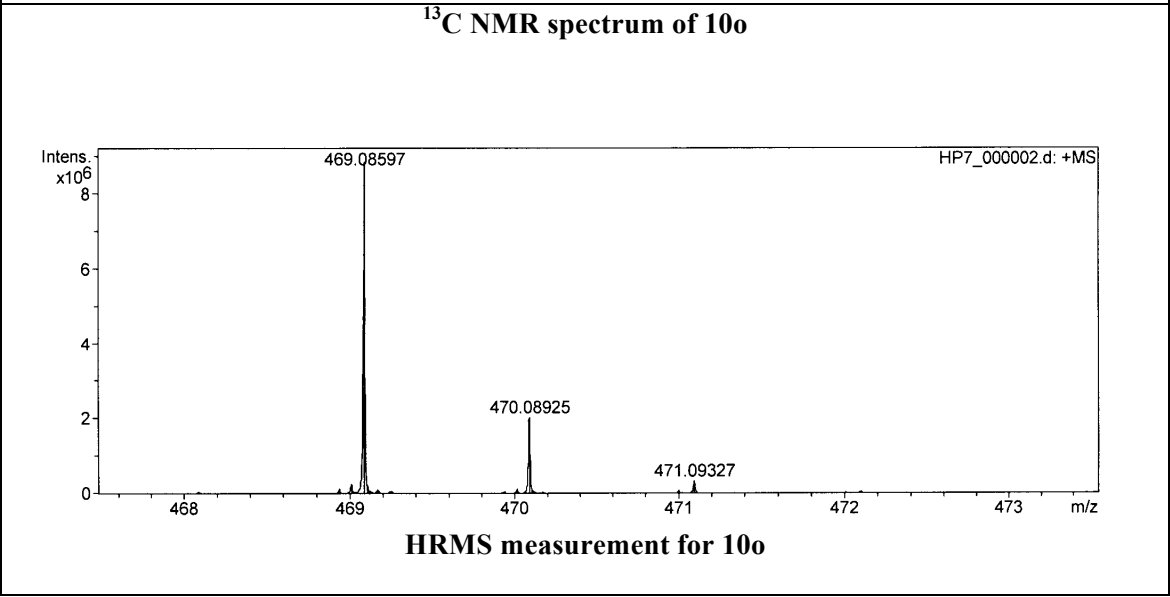

Supplement: c0gc00952k.pdf [file c0gc00952k.pdf]
